# Supplementary material for: Time elapsed between Zika and dengue virus infections affects antibody and T cell responses
Source: PubMed Central journal article supplement (PMC6754404; doi:10.1038/s41467-019-12295-2), 2019-09-20
Supplement: 41467_2019_12295_MOESM1_ESM.pdf [file 41467_2019_12295_MOESM1_ESM.pdf]

**Time elapsed between Zika and dengue virus infections affects antibody and T cell responses**

Pérez-Guzmán *et al.*

**Supplementary Information**

---

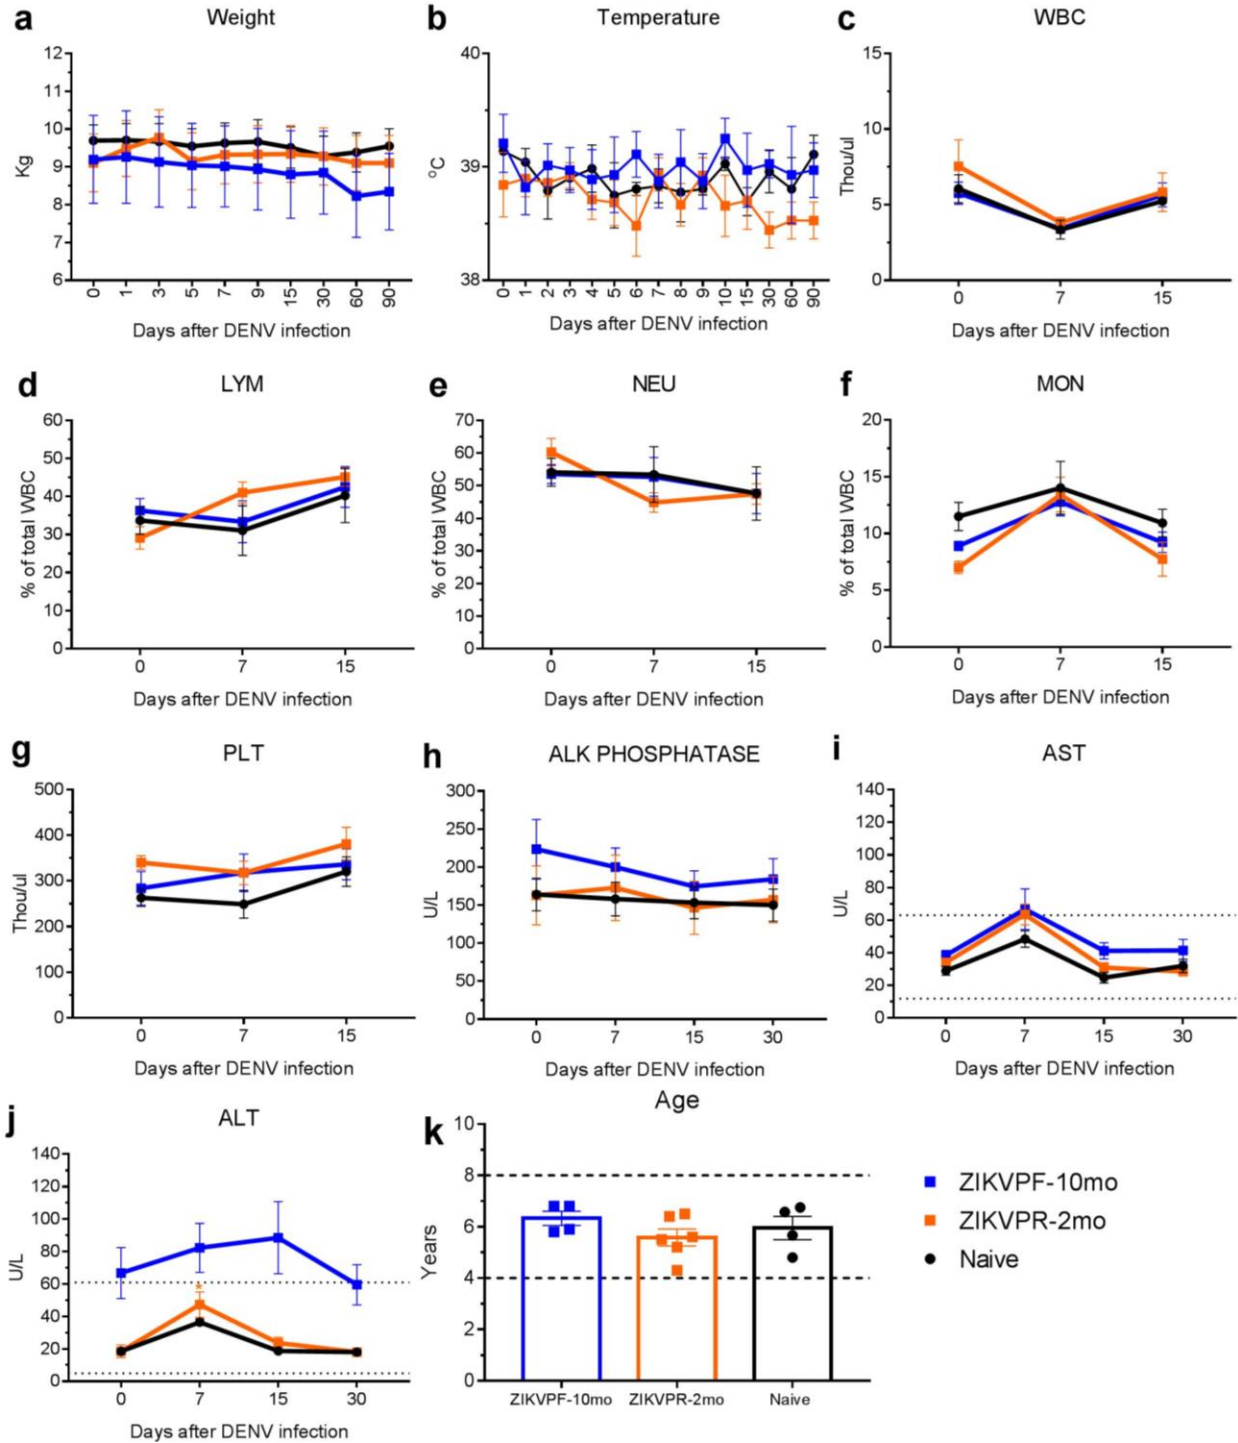

**Supplementary Figure 1 | Clinical status and vital signs kinetics in ZIKV-immune and naïve macaques.** (a) Weight (kg) was measured at baseline, 1, 3, 5, 7, 9, 15, 30, 60 and 90 dpi. (b) Temperature (°C) was monitored with an infrared device at baseline, 1-10, 15, 30, 60 and 90 dpi. Complete blood cell counts (CBC) parameters (thou/ul and/or % of total WBC) such as (c) white blood cells (WBC), (d) lymphocytes (LYM), (e) neutrophils (NEU), (f) monocytes (MON), and (g) platelets (PLT) were screened at baseline, 7, and 15 dpi. Comprehensive metabolic panel (CMP)

was performed to assess levels (U/L) of **(h)** alkaline phosphatase (ALK PHOSPHATASE) and liver enzymes **(i)** aspartate transaminase (AST), and **(j)** alanine transaminase (ALT) at baseline, 7, 15 and 30 dpi. Normal range of AST and ALT are depicted for reference. **(k)** Age of rhesus macaques are depicted including the range of young adults for reference. Symbols represent mean level detected for each parameter per cohort per timepoint: blue squares (ZIKVPF-10mo), orange squares (ZIKVPR-2mo) and black circles (Naïve). Lines connect mean values detected over time. Error bars indicate the standard error of the mean (SEM) for each cohort per timepoint. Statistically significant differences between groups were determined using Two-Way Anova adjusted for Tukey's multiple comparisons test including 10, 15, 3, 4, and 3 families for panel a, b, c-g, h-j, and k, respectively, and 3 comparisons per family. For differences in ALT levels Two-Way Anova Dunnett's multiple comparisons test (comparison of each group response at each timepoint versus baseline of the same group) was performed including 3 families, and 3 comparisons per family due to divergence of non-specific levels between cohorts at baseline. Statistically differences are reported as multiplicity adjusted *p* values (\* <0.05).

## DENV-2 RNAemia - Area Under the Curve

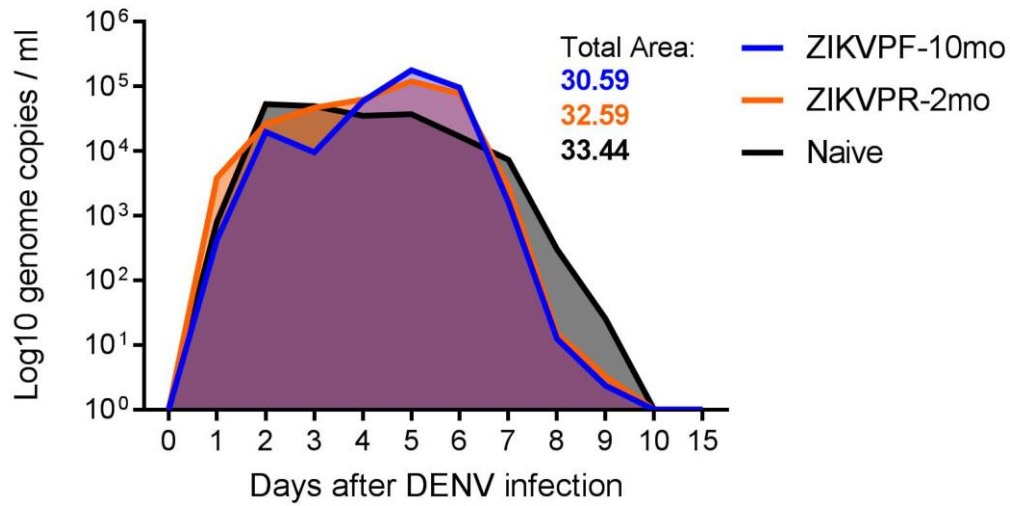

**Supplementary Figure 2 | Previous ZIKV immunity modulates DENV RNAemia kinetics and is associated with a lower area under the curve.** The area under the curve (AUC) was calculated using log-transformed values of DENV-2 RNAemia in ZIKV-immune and naïve animals. The total area by group is depicted on the graph as light blue, light orange and gray for ZIKVPF-10mo, ZIKVPR-2mo, and Naïve, respectively. Lines mark the mean value of genome copies per group per timepoint. A value of 1 was assigned to all samples below the LOD in order to calculate the means.

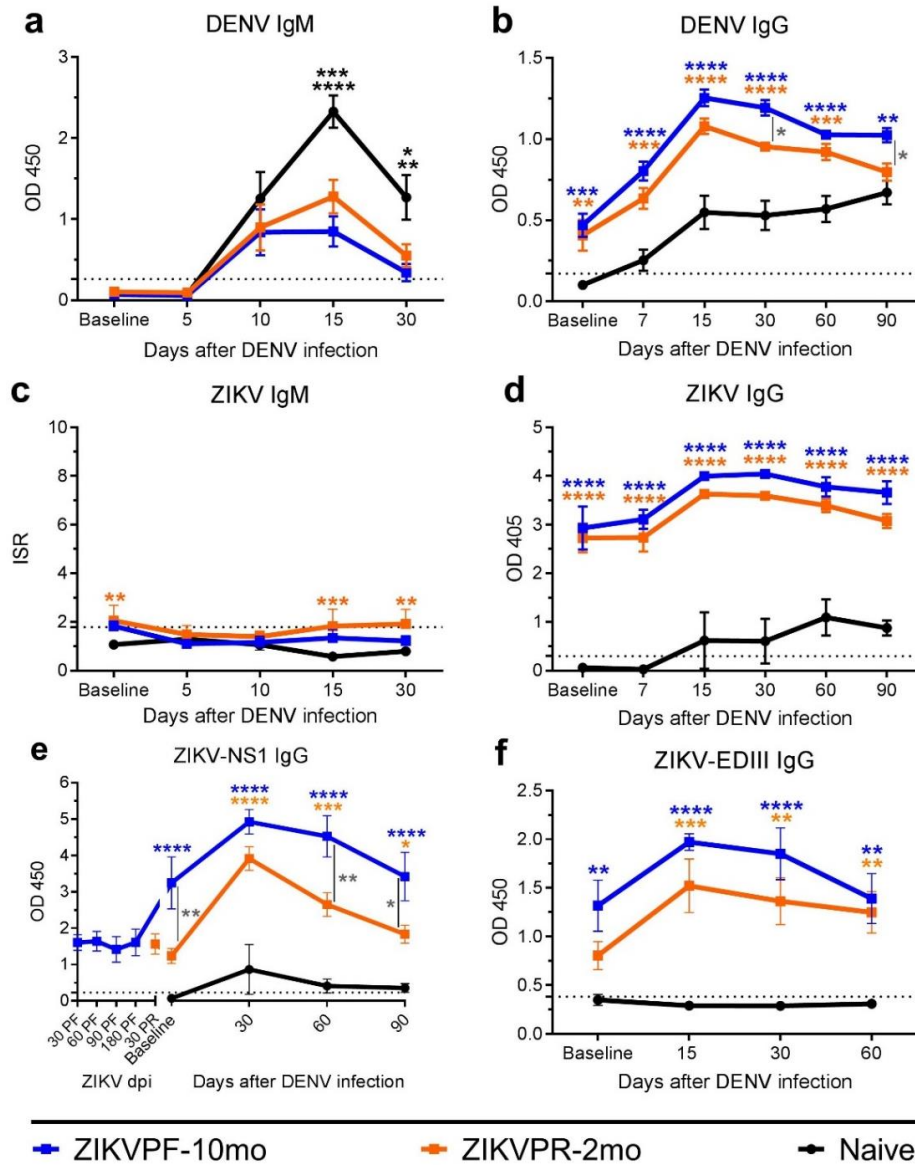

**Supplementary Figure 3 | Serological cross-reactivity is boosted by ZIKV immunity.** Levels of DENV (a) IgM and (b) IgG, and ZIKV (c) IgM, (d) IgG, (e) NS1-IgG and (f) EDIII-IgG were measured by ELISA at multiple timepoints before and after DENV infection. Symbols connected with full lines represent mean levels of Abs detected per cohort over time: blue squares (ZIKVPR-10mo), orange squares (ZIKVPR-2mo) and black circles (Naive). Panel e includes additional timepoints before DENV infection for ZIKV-immune groups: 30, 60, 90 and 180 days after ZIKV (H/PF/2013) infection for the ZIKVPR-10mo group, and 30 days after ZIKV (PRVABC59) infection for the ZIKVPR-2mo group. Error bars indicate the standard error of the mean (SEM) and dotted line mark the limit of detection for each individual ELISA. Results were read at OD 450, 405 or using ISR (Immune Status Ratio) following manufacturer's instructions. Statistically significant differences between groups were calculated using Two-Way Anova adjusted for Tukey's multiple comparisons test including 5, 6, 9, and 4 families, and 3 comparisons per family. Significant multiplicity adjusted  $p$  values (\* < 0.05, \*\* < 0.01, \*\*\* < 0.001, \*\*\*\* < 0.0001) are shown. Blue and orange asterisks represent significant difference between the corresponded ZIKV immune groups and naive group, and gray asterisks indicate a significant difference between ZIKV immune groups.

**DENV2  
Neut %**

**ZIKVPF-10mo**

**ZIKVPR-2mo**

**Naive**

**dpi**

**0**

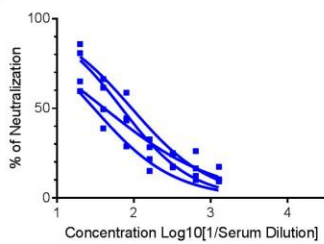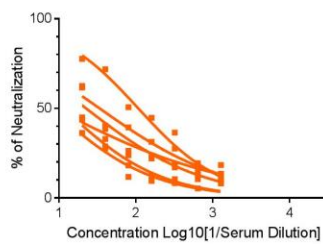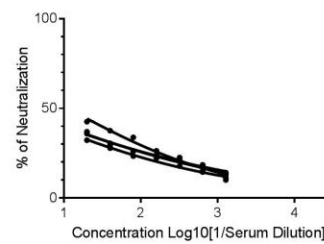

**7**

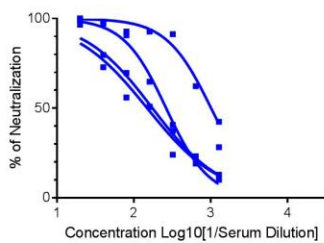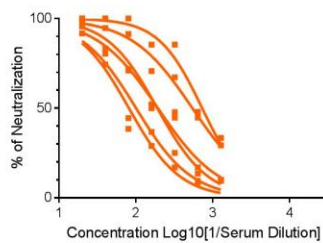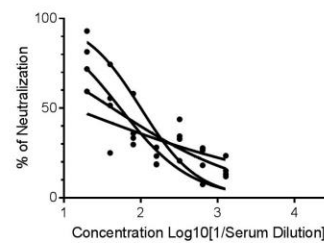

**15**

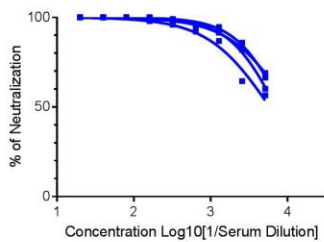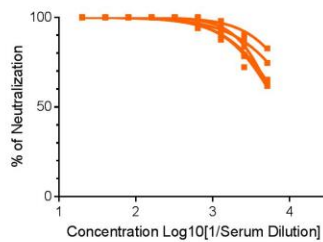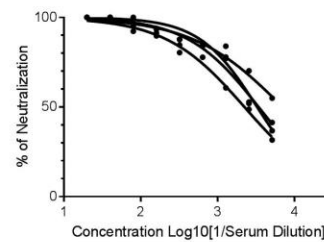

**30**

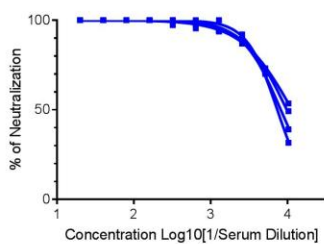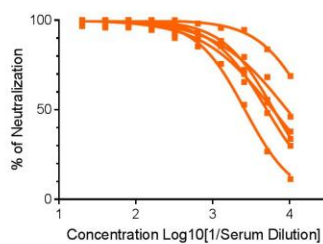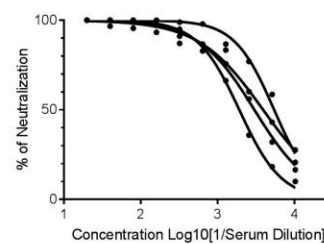

**60**

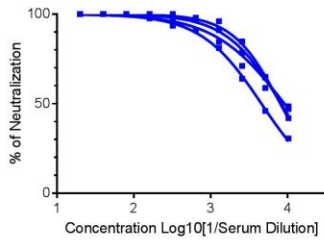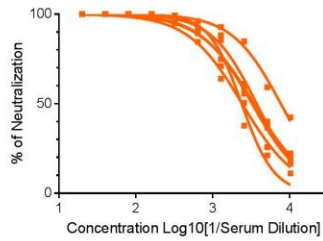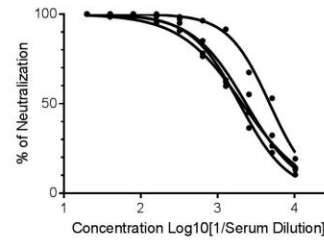

**90**

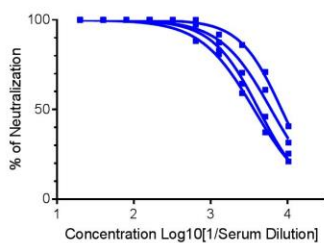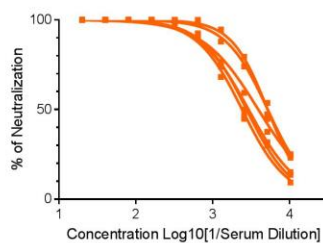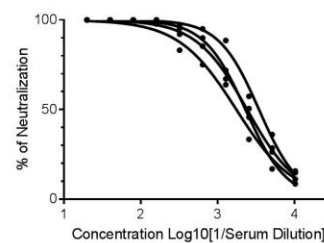

**Supplementary Figure 4 | Neutralization kinetics against DENV-2.** Percentage of DENV-2 neutralization of each animal per group calculated by the transformation of PRNT60 Neut 2-fold

titers into Log<sub>10</sub> (1/serum dilution), and sigmoidal-dose response curves were generated. Each column of panels represent the % of DENV-2 neutralization for each group (ZIKVVPF-10mo: blue squares/curves; ZIKVPR-2mo: orange squares/curves; Naïve: black circles/curves) and each row of panels represent a timepoint before and after DENV infection (baseline, 7, 15, 30, 60, 90 dpi).

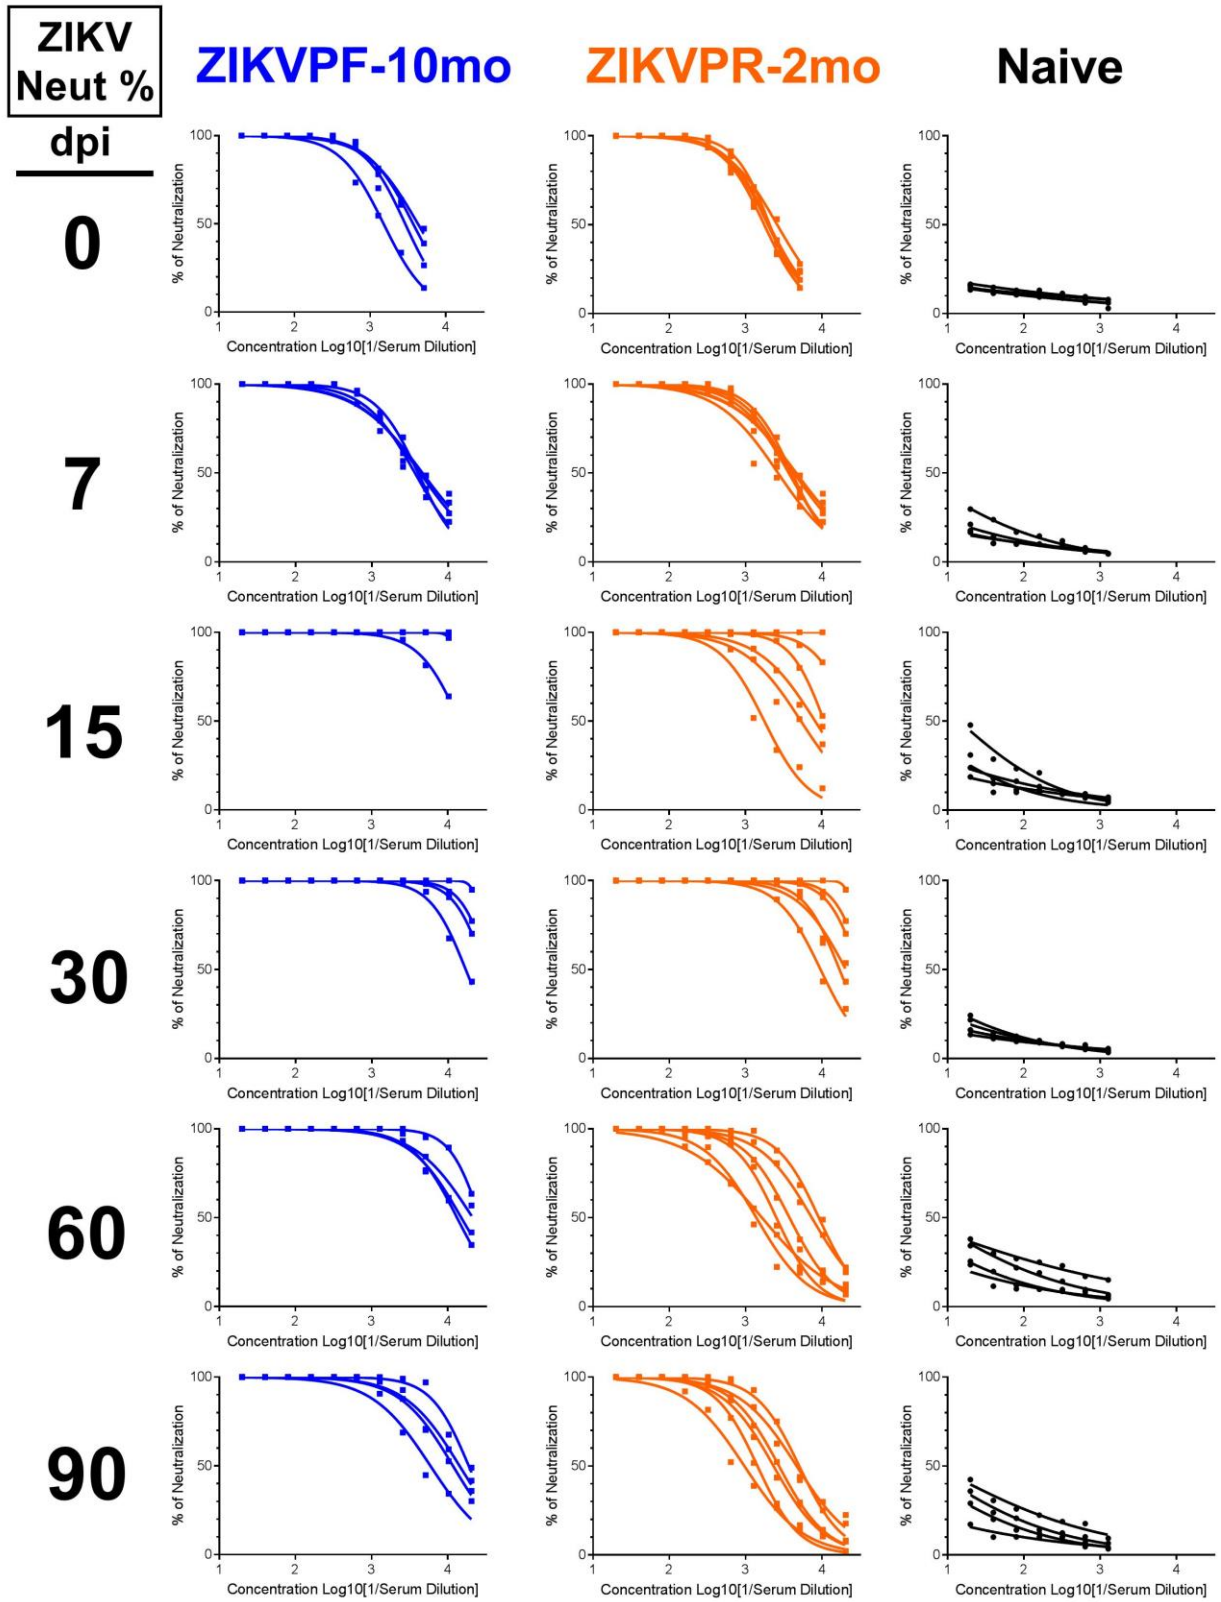

**Supplementary Figure 5 | Neutralization kinetics against ZIKV.** Percentage of ZIKV (H/PF/2013) neutralization of each animal per group calculated by the transformation of PRNT60



Neut 2-fold titers into Log<sub>10</sub> (1/serum dilution), and sigmoidal-dose response curves were generated. Each column of panels represent the % of ZIKV neutralization for each group (ZIKVPF-10mo: blue squares/curves; ZIKVPR-2mo: orange squares/curves; Naïve: black circles/curves) and each row of panels represent a timepoint before and after DENV infection (baseline, 7, 15, 30, 60, 90 dpi).

## Neut60 Ab Titers vs ZIKV H/PF/2013 & PRVABC59 After ZIKV infection

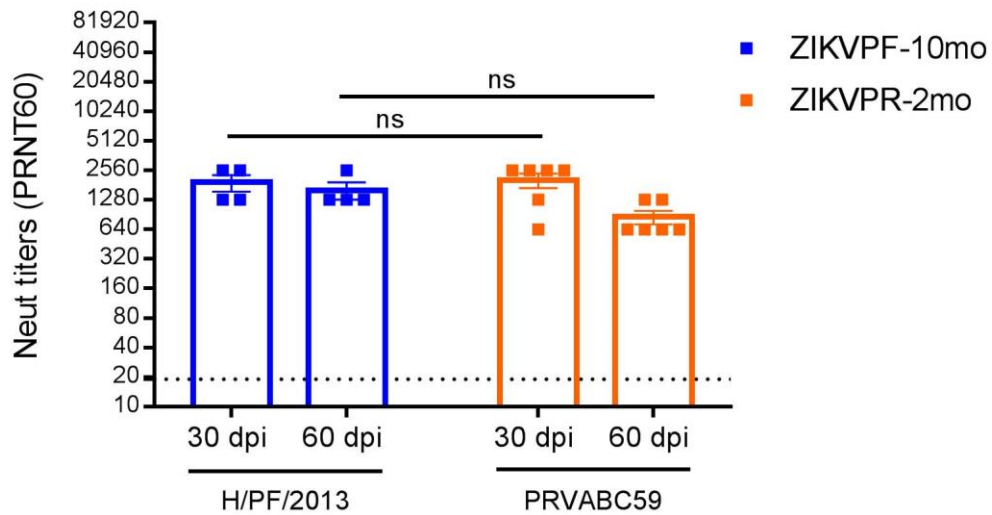

### Supplementary Figure 6 | Similar neutralizing titers induced by two different ZIKV strains.

NAb titers against H/PF/2013 and PRVABC59 ZIKV strains for ZIKVPR-10mo and ZIKVPR-2mo groups, respectively, were determined by PRNT60 at 30 and 60 after ZIKV infection. Symbols indicate levels of NAb titers detected per animal: blue squares (ZIKVPR-10mo), and orange squares (ZIKVPR-2mo). Error bars represent the standard error of the mean (SEM). PRNT60: NAb titer capable of reduce 60% or more of ZIKV strains plaque-forming units (pfu) compared with the mock (control of virus without serum). A PRNT60 1:20 titer was considered positive, and <1:20 as a negative Neut titer. Dotted line mark <1:20 for negative results. Statistically significant differences (ns: not significant) between two groups were calculated using Two-Way Anova corrected for Sidak's multiple comparisons test including 1 family, and 2 comparisons within the family.

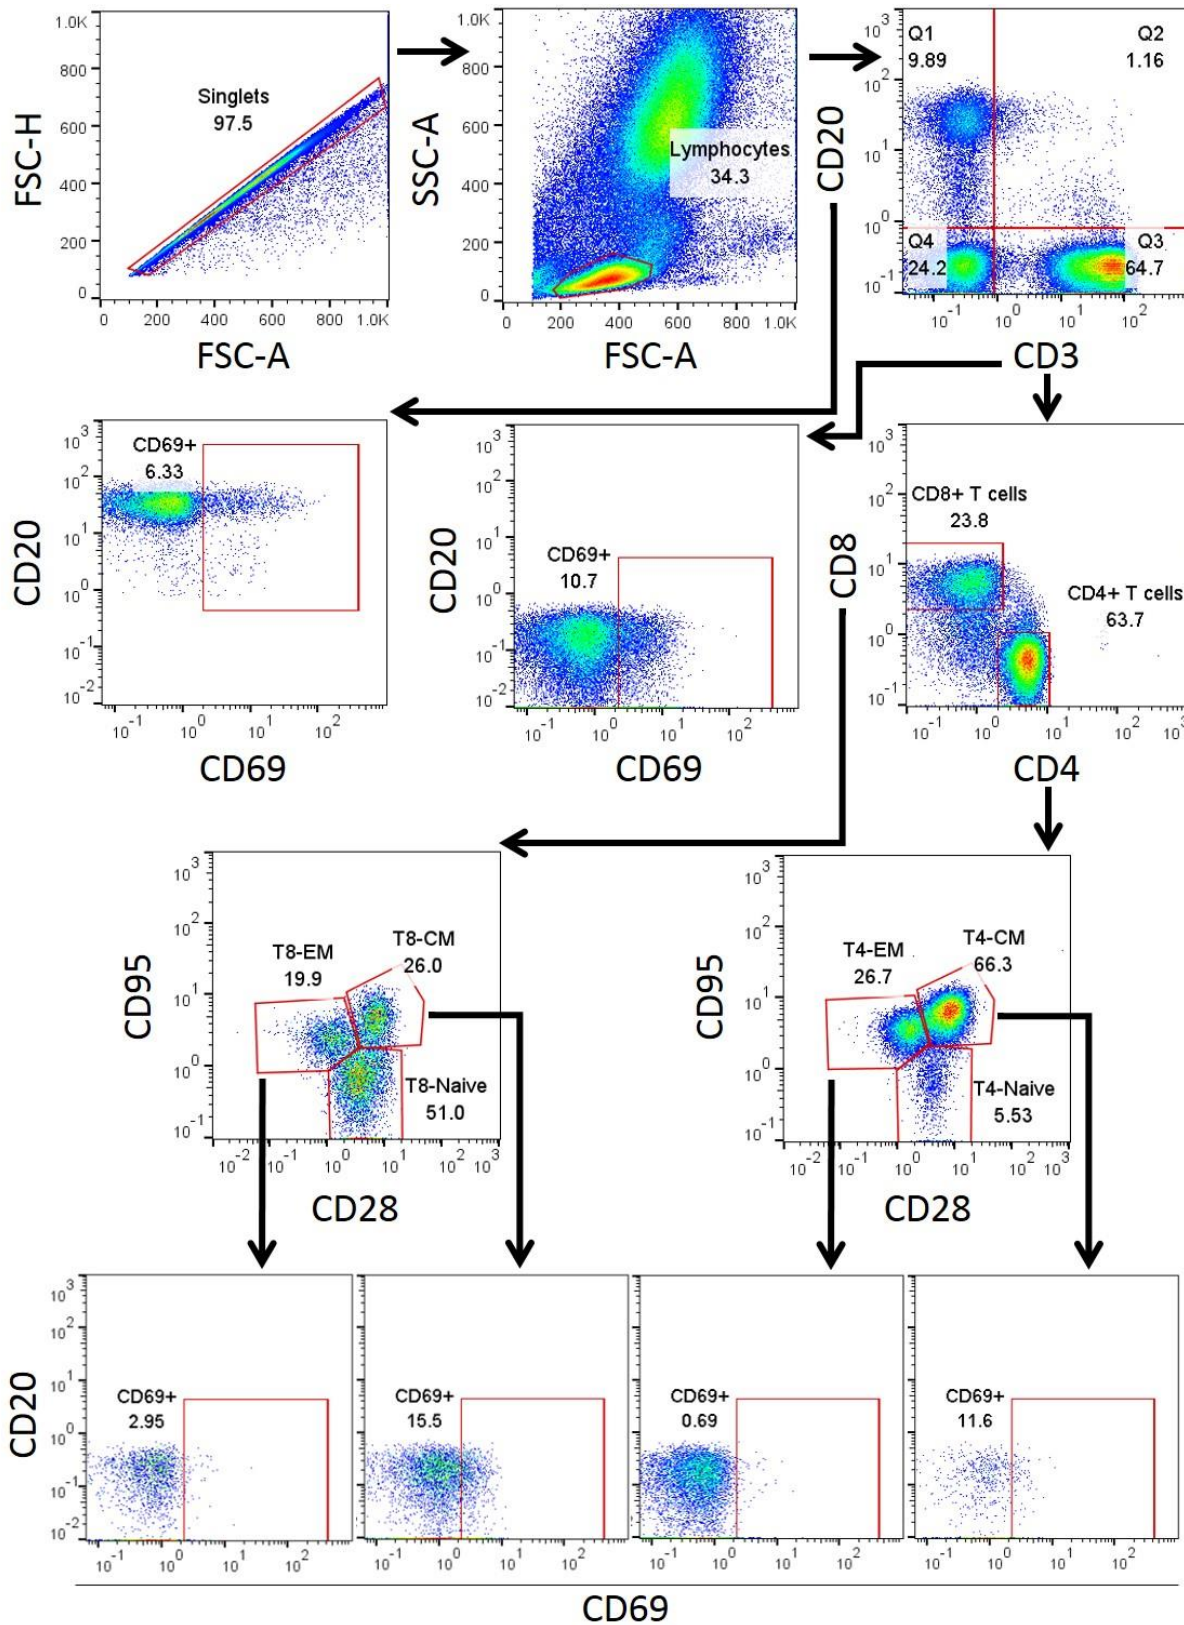

**Supplementary Figure 7 | Gating strategy for immunophenotyping and activation of B cells, and memory T cell subpopulations. Single cells (singlets) were selected by their FSC area**

(FSC-A) and height (FSC-H) patterns. Lymphocytes (LYM) were gated based on their characteristic forward and side scatter pattern (FSC, SSC). T cells were selected gating on the CD3<sup>+</sup> population. CD4<sup>+</sup> and CD8<sup>+</sup> T cells were defined as CD3<sup>+</sup>CD4<sup>+</sup> and CD3<sup>+</sup>CD8<sup>+</sup>, respectively. Naive (N; CD28<sup>+</sup>CD95<sup>-</sup>), effector memory (EM; CD28<sup>-</sup>CD95<sup>+</sup>) and central memory (CM; CD28<sup>+</sup>CD95<sup>+</sup>) T cell subpopulations were determined within CD4<sup>+</sup> and CD8<sup>+</sup> T cells. B cells were defined as CD20<sup>+</sup>CD3<sup>-</sup>. The activation of B and T cell memory subpopulations (EM and CM) was assessed by the presence of the early activation marker CD69.

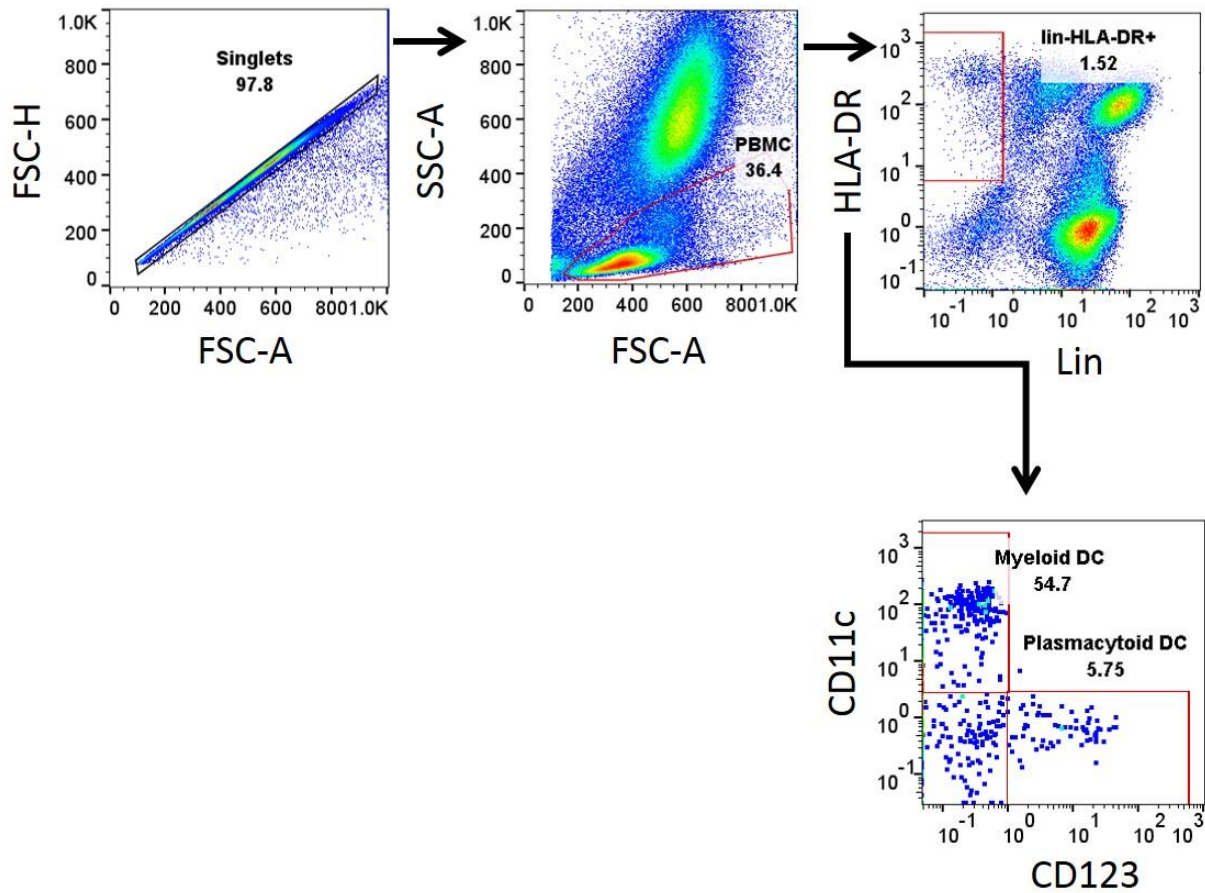

**Supplementary Figure 8 | Gating strategy for immunophenotyping of plasmacytoid and myeloid dendritic cells.** Single cells (singlets) were selected by their FSC area (FSC-A) and height (FSC-H) patterns. Lymphocytes (LYM) were gated based on their characteristic forward and side scatter pattern (FSC, SSC). Dendritic cells (DC) were separated in two populations within the Lineage-DR<sup>+</sup> (HLA-DR<sup>+</sup> CD3<sup>-</sup> CD14<sup>-</sup> CD16<sup>-</sup> CD20<sup>-</sup> CD8<sup>-</sup> NKG2A<sup>-</sup>) by the expression of CD123 (plasmacytoid, pDC) or CD11c (myeloid, mDCs).

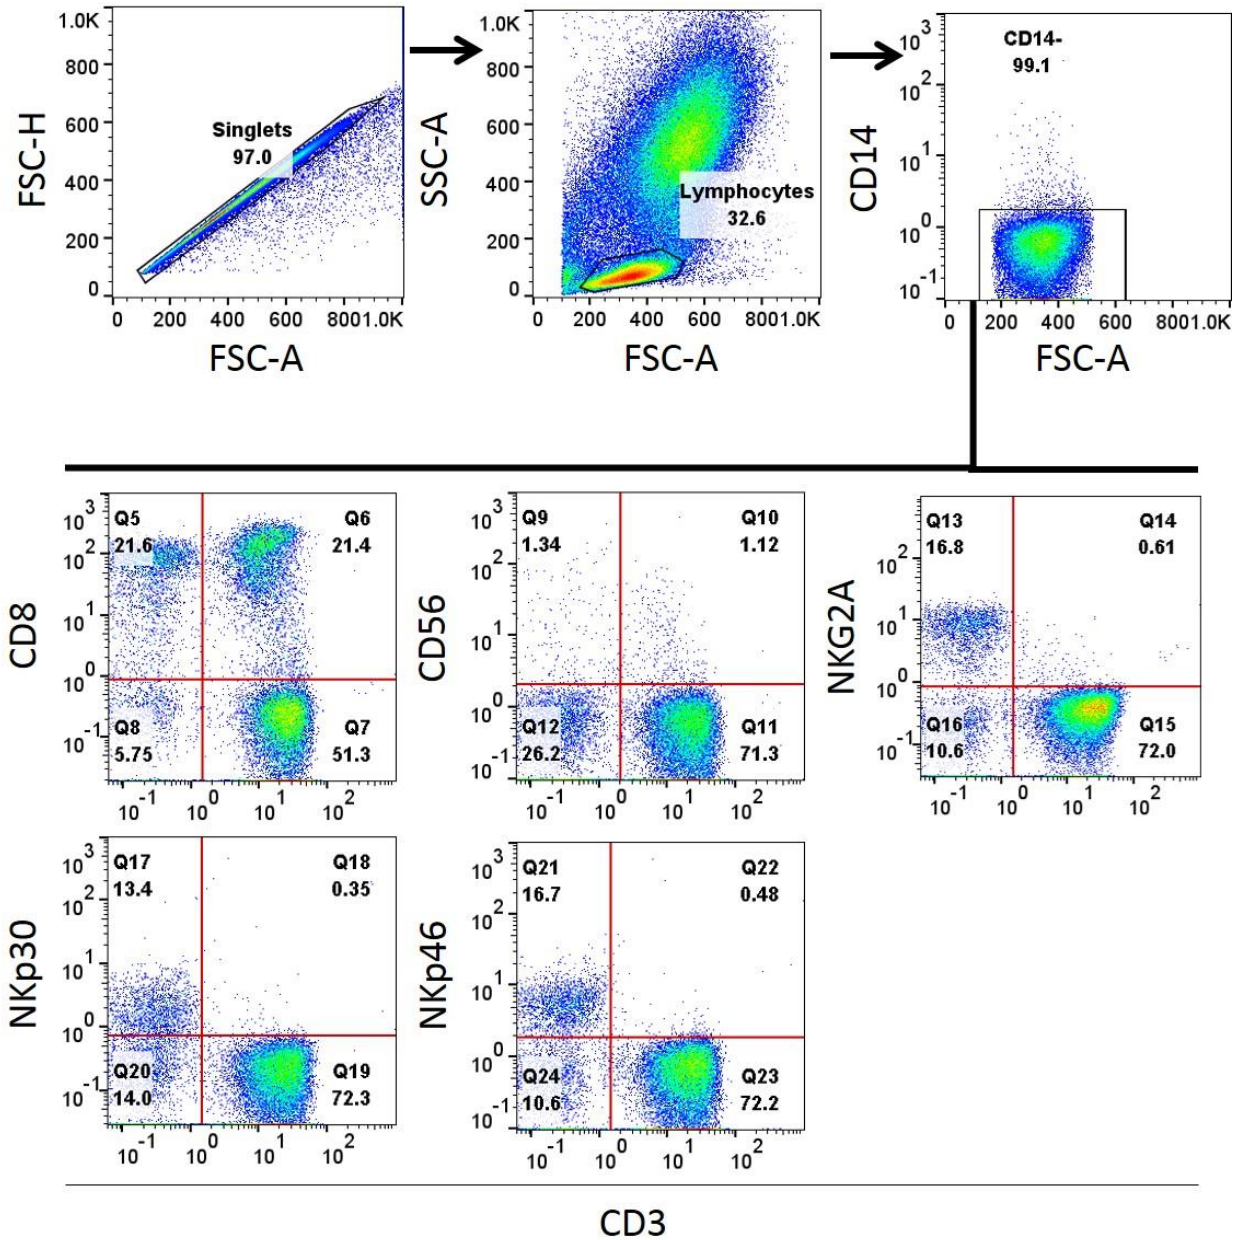

**Supplementary Figure 9 | Gating strategy for Natural killer cell subpopulations.** Single cells (singlets) were selected by their FSC area (FSC-A) and height (FSC-H) patterns. Lymphocytes (LYM) were gated based on their characteristic forward and side scatter pattern (FSC, SSC). Natural killer (NK) cells were defined as CD3<sup>-</sup>CD20<sup>-</sup>CD14<sup>-</sup> and analyzed by the double positive expression of the following NK cell markers: CD8, CD56, NKG2A, NKp30, and NKp46.

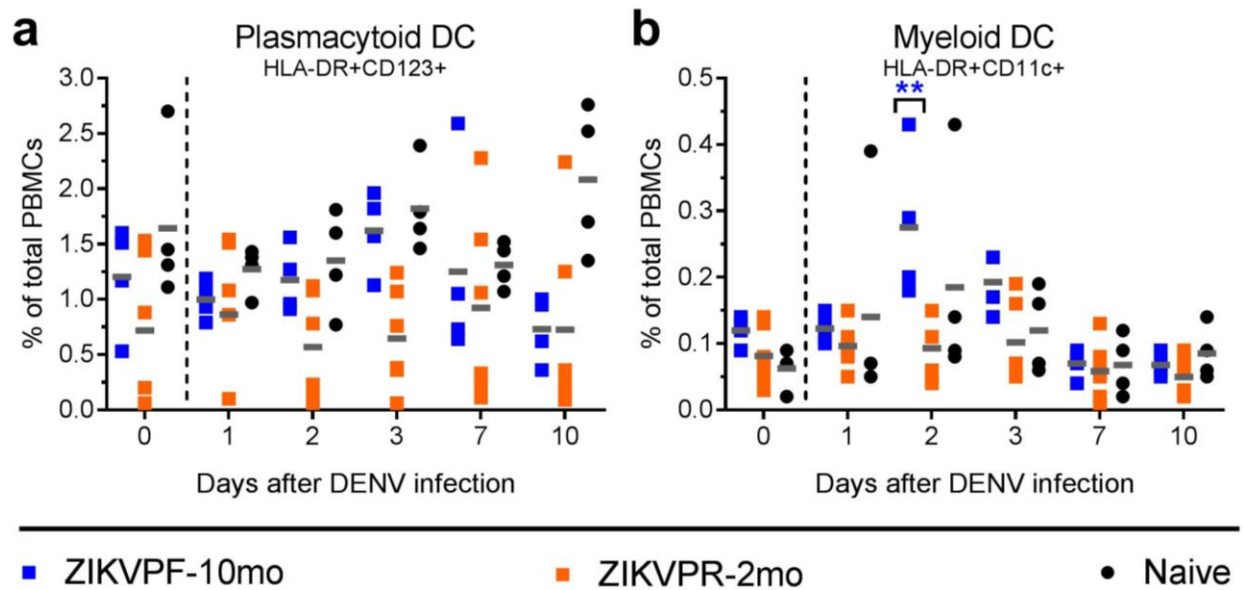

**Supplementary Figure 10 | Dendritic cells subsets modulation induced by DENV infection.**

The frequency (% of total PBMCs) of dendritic cells (DCs) subsets including (a) plasmacytoid (pDCs: Lin-HLA-DR<sup>+</sup>CD123<sup>+</sup>) and (b) myeloid (mDCs: Lin-HLA-DR<sup>+</sup>CD11c<sup>+</sup>) was assessed before and up to 10 days after DENV infection by immunophenotyping using flow cytometry analysis. Symbols represent individual animals per group for each timepoint: blue squares (ZIKVVPF-10mo), orange squares (ZIKVPR-2mo) and black circles (Naïve). Short gray lines depict mean value for each group detected overtime. Cutted line divide % of DCs quantified before and after DENV infection. Statistically significant differences within groups were determined using Two-Way Anova Dunnett's multiple comparisons test (comparison of each group response at each timepoint versus baseline of the same group) including 3 families, and 5 comparisons per family. Significant differences are reported as multiplicity adjusted *p* values (\* <0.05, \*\* <0.01, \*\*\* <0.001, \*\*\*\* <0.0001). Asterisks represent significant difference between the corresponded timepoint and baseline within the same group.

## NK Receptors

NK Sub-populations

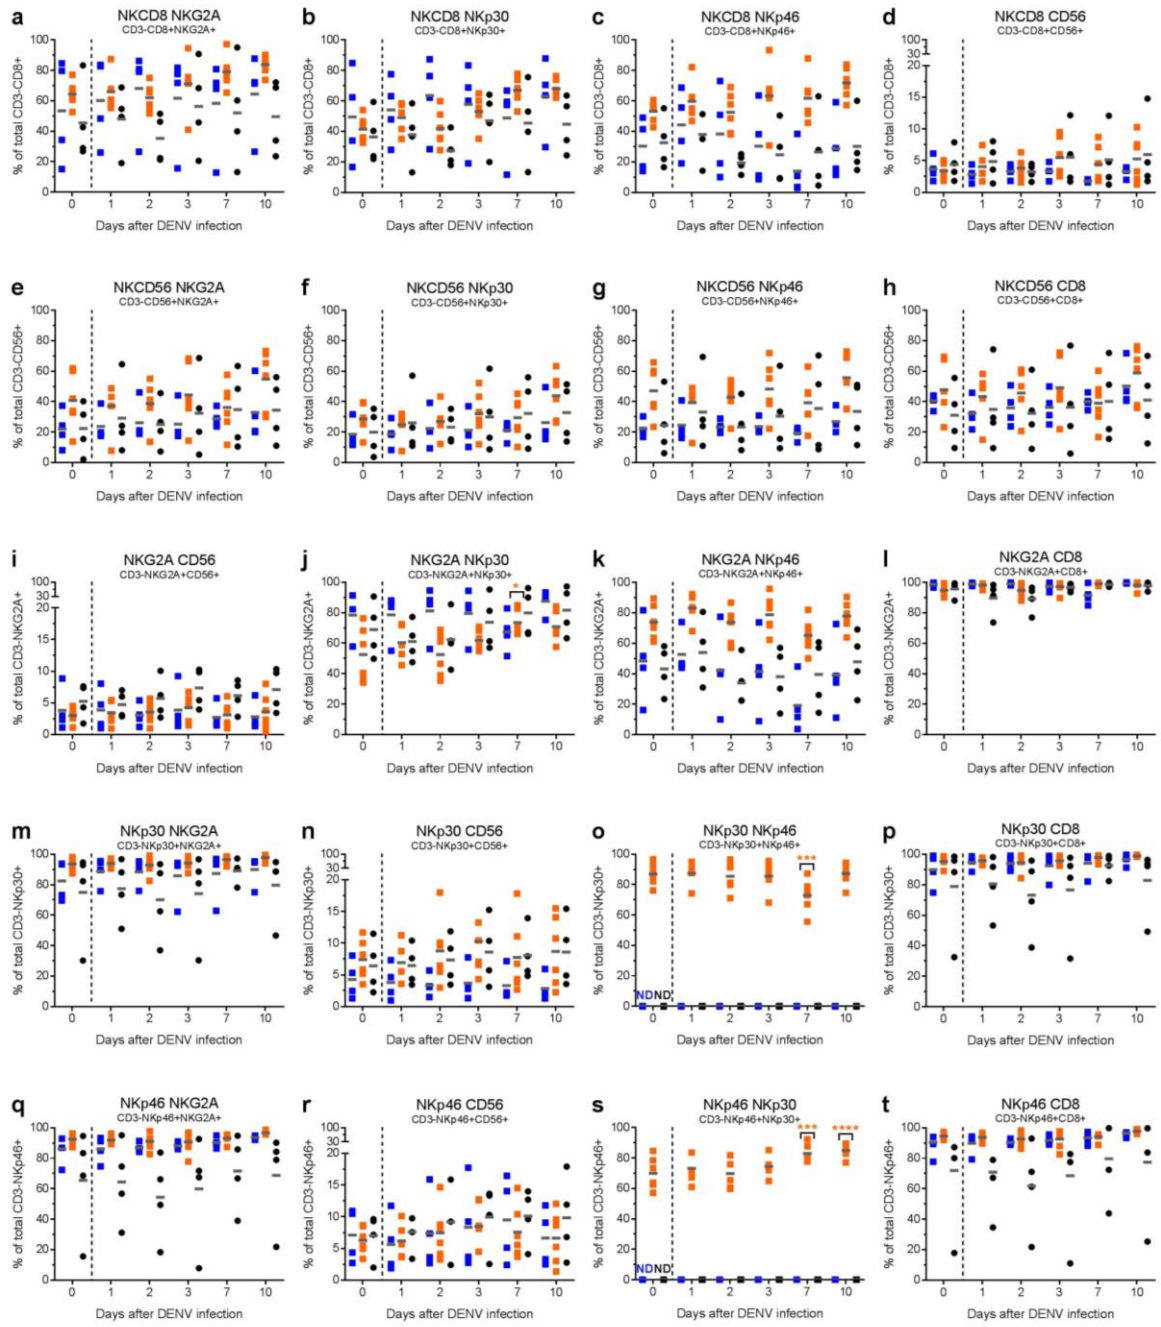

■ ZIKVPF-10mo      ■ ZIKVPR-2mo      ● Naive

**Supplementary Figure 11 | Natural killer cell subpopulations and their differential receptors expression.** Natural killer (NK) cell subpopulations and the relative expression of multiple NK receptors within each subpopulation: (a-d) NKCD8, (e-h) NKCD56, (i-l) NKG2A, (m-p) NKp30 and (q-t) NKp46 were quantified by immunophenotyping using flow cytometry analysis before and up to 10 days after DENV infection. Individual symbols represent each animal per group over



time: blue squares (ZIKVPF-10mo), orange squares (ZIKVPR-2mo) and black circles (Naïve). Short gray lines mark mean value for each group. Cutted line divide % of NK cells quantified before and after DENV infection. Statistically significant differences within groups were determined using Two-Way Anova Dunnett's multiple comparisons test (comparison of each group response at each timepoint versus baseline of the same group) including 3 families, and 5 comparisons per family. Significant differences are reported as multiplicity adjusted *p* values (\* <0.05, \*\* <0.01, \*\*\* <0.001, \*\*\*\* <0.0001). Asterisks represent significant difference between the corresponded timepoint and baseline within the same group. ND (Not Done) in panels 8o and 8s refers that for ZIKVPF-10mo and Naïve groups the NKp30<sup>+</sup>NKp46<sup>+</sup> and NKp46<sup>+</sup>NKp30<sup>+</sup> subpopulations were not measured.

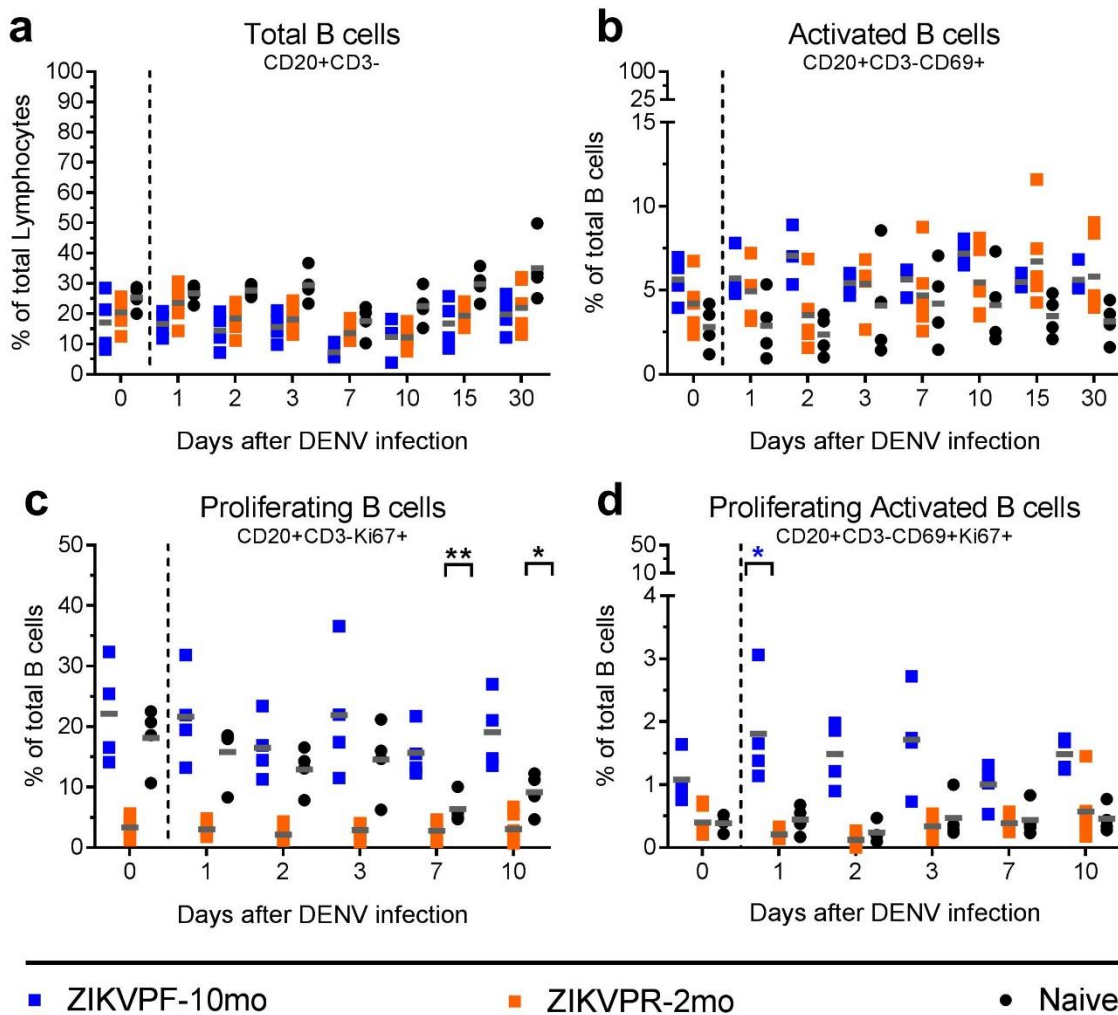

**Supplementary Figure 12 | B cells proliferation and activation higher in ZIKV middle-convalescent macaques.** The (a) total (% of total Lymphocytes), (b) activated, (c) proliferating, and (d) proliferating/activated B cells (% of total B cells) were determined at baseline and following DENV infection by immunophenotyping using flow cytometry analysis. B cells proliferation and activation were monitored since baseline up to 10 and 30 dpi, respectively. Symbols represent individual animals per group for each timepoint: blue squares (ZIKVVPF-10mo), orange squares (ZIKVPR-2mo) and black circles (Naïve). Short gray lines depict mean value of B cells percent in each group of animals per timepoint. Cutted line divide % of B cells quantified before and after DENV infection. Statistically significant differences within groups were determined using Two-Way Anova Dunnett's multiple comparisons test (comparison of each group response at each timepoint versus baseline of the same group) including 3 families, and 7 and 5 comparisons per family in panels a-b and c-d, respectively. Significant differences are reported as multiplicity adjusted *p* values (\* <0.05, \*\* <0.01). Asterisks represent significant difference between the corresponded timepoint and baseline within the same group.

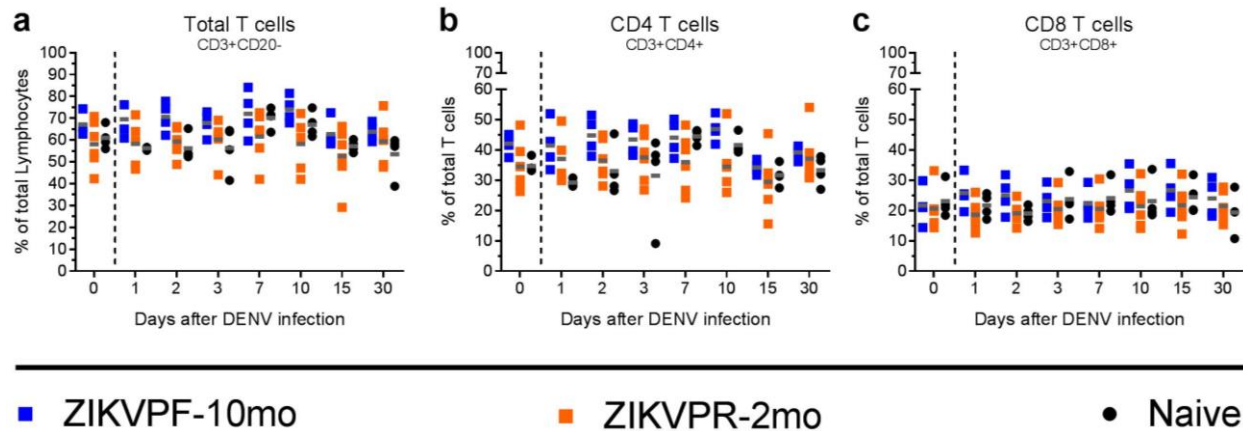

**Supplementary Figure 13 | Comparable T cells frequency between groups.** The (a) total T cells (% of total Lymphocytes), (b) CD4<sup>+</sup> and (c) CD8<sup>+</sup> T cell compartments (% of total T cells) frequencies were quantified at baseline and following DENV infection up to 30 dpi by immunophenotyping using flow cytometry. Symbols represent individual animals per group for each timepoint: blue squares (ZIKVPF-10mo), orange squares (ZIKVPR-2mo) and black circles (Naïve). Short gray lines mark mean value of T cells percent in each cohort per timepoint. Cutted line divide % of T cells quantified before and after DENV infection. Statistically significant differences within groups were determined using Two-Way Anova Dunnett's multiple comparisons test (comparison of each group response at each timepoint versus baseline of the same group) including 3 families, and 7 comparisons per family.

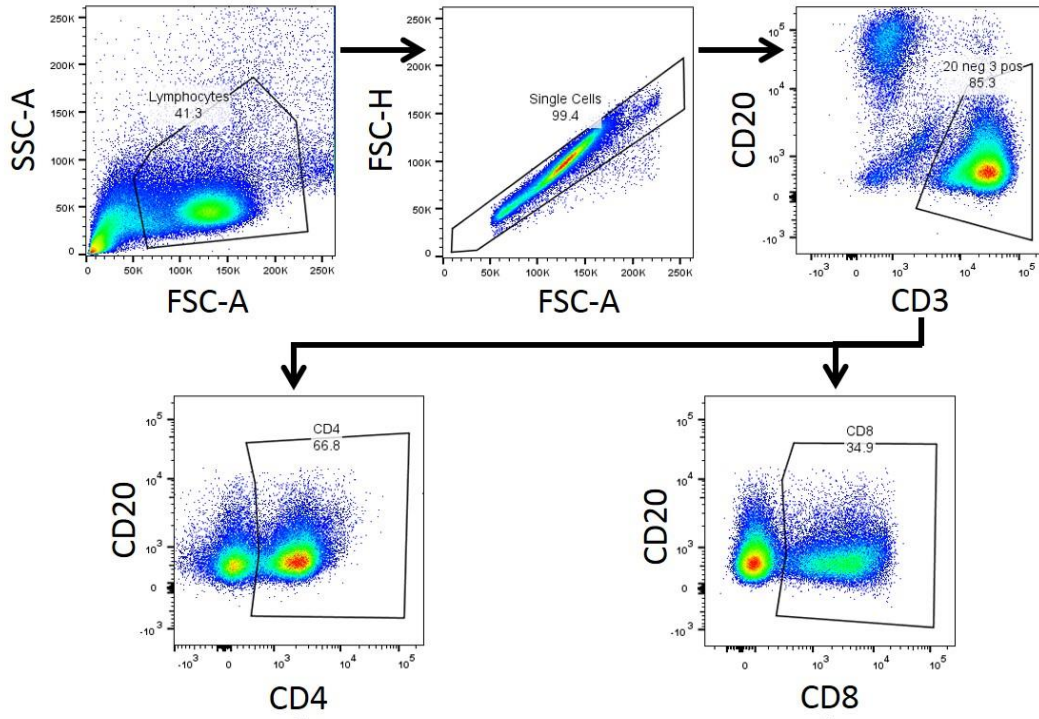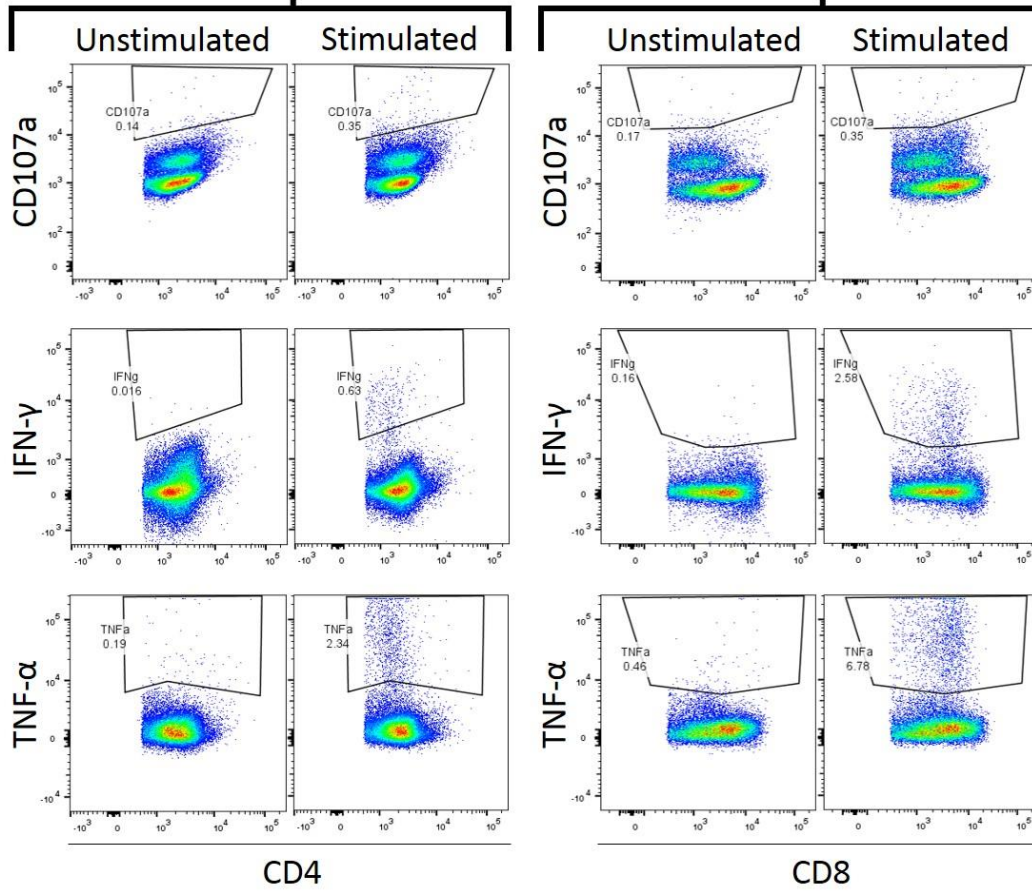

**Supplementary Figure 14 | Gating strategy for CD4+ and CD8+ T cell functional response.**

After stimulation, lymphocytes (LYM) were gated based on their characteristic forward and side scatter pattern (FSC, SSC). Single cells (singlets) were selected by their FSC area (FSC-A) and height (FSC-H) patterns. Cells were stained for the following markers: CD3, CD4, CD8, CD20 (excluded), CD107a (functional cytotoxicity). Levels of IFN- $\gamma$  and TNF- $\alpha$  also were measured in gated lymphocytes cell populations.

**Supplementary Table 1 | Sequence alignment and amino acid identity of ZIKV strains PRVABC59 and H/PF/2013.**

|                                                                                                                                                                                |                                                                                                                                                                                                                                                                                                                                                                                                                                                                                                                                                                                                                                                                                                                                                                                                                                                                                                                                                                                                                                                                                                                                                                                                                                                                                                                                                                                                                                                                                                                                                                                                                                                                                                                                                                                                                                                                                                                                                                                                                                                                                                                                                                                                                                                                                                                                                                                                                                                                                                                                                                                                                                                                                                                                                                                                                                                                                                                                                                                                                                                                                                                                                                                                                                                                                                                                                                                                                                                                                                                                                                                                                                                                                                                                                                                                                                                                                                                                                                                                                                                                                                                                                                                                                                                                                                                                                                                                                                                                                                                                                                                                                                                                                                                                                                                                                                                                                                                                                                                                                                                                                                                                                                                                                                                                                        |
|--------------------------------------------------------------------------------------------------------------------------------------------------------------------------------|----------------------------------------------------------------------------------------------------------------------------------------------------------------------------------------------------------------------------------------------------------------------------------------------------------------------------------------------------------------------------------------------------------------------------------------------------------------------------------------------------------------------------------------------------------------------------------------------------------------------------------------------------------------------------------------------------------------------------------------------------------------------------------------------------------------------------------------------------------------------------------------------------------------------------------------------------------------------------------------------------------------------------------------------------------------------------------------------------------------------------------------------------------------------------------------------------------------------------------------------------------------------------------------------------------------------------------------------------------------------------------------------------------------------------------------------------------------------------------------------------------------------------------------------------------------------------------------------------------------------------------------------------------------------------------------------------------------------------------------------------------------------------------------------------------------------------------------------------------------------------------------------------------------------------------------------------------------------------------------------------------------------------------------------------------------------------------------------------------------------------------------------------------------------------------------------------------------------------------------------------------------------------------------------------------------------------------------------------------------------------------------------------------------------------------------------------------------------------------------------------------------------------------------------------------------------------------------------------------------------------------------------------------------------------------------------------------------------------------------------------------------------------------------------------------------------------------------------------------------------------------------------------------------------------------------------------------------------------------------------------------------------------------------------------------------------------------------------------------------------------------------------------------------------------------------------------------------------------------------------------------------------------------------------------------------------------------------------------------------------------------------------------------------------------------------------------------------------------------------------------------------------------------------------------------------------------------------------------------------------------------------------------------------------------------------------------------------------------------------------------------------------------------------------------------------------------------------------------------------------------------------------------------------------------------------------------------------------------------------------------------------------------------------------------------------------------------------------------------------------------------------------------------------------------------------------------------------------------------------------------------------------------------------------------------------------------------------------------------------------------------------------------------------------------------------------------------------------------------------------------------------------------------------------------------------------------------------------------------------------------------------------------------------------------------------------------------------------------------------------------------------------------------------------------------------------------------------------------------------------------------------------------------------------------------------------------------------------------------------------------------------------------------------------------------------------------------------------------------------------------------------------------------------------------------------------------------------------------------------------------------------------------------------|
| <p>Pairwise alignment of both ZIKV strains sequences.<br/>(Sequences downloaded from ViPR database and global alignment was performed using Blosum62 in Genious Software).</p> | <p>&gt;99.99% amino acid identity</p>                                                                                                                                                                                                                                                                                                                                                                                                                                                                                                                                                                                                                                                                                                                                                                                                                                                                                                                                                                                                                                                                                                                                                                                                                                                                                                                                                                                                                                                                                                                                                                                                                                                                                                                                                                                                                                                                                                                                                                                                                                                                                                                                                                                                                                                                                                                                                                                                                                                                                                                                                                                                                                                                                                                                                                                                                                                                                                                                                                                                                                                                                                                                                                                                                                                                                                                                                                                                                                                                                                                                                                                                                                                                                                                                                                                                                                                                                                                                                                                                                                                                                                                                                                                                                                                                                                                                                                                                                                                                                                                                                                                                                                                                                                                                                                                                                                                                                                                                                                                                                                                                                                                                                                                                                                                  |
| <p>Envelope (E) protein region of both ZIKV strains.</p>                                                                                                                       | <p>Identical</p>                                                                                                                                                                                                                                                                                                                                                                                                                                                                                                                                                                                                                                                                                                                                                                                                                                                                                                                                                                                                                                                                                                                                                                                                                                                                                                                                                                                                                                                                                                                                                                                                                                                                                                                                                                                                                                                                                                                                                                                                                                                                                                                                                                                                                                                                                                                                                                                                                                                                                                                                                                                                                                                                                                                                                                                                                                                                                                                                                                                                                                                                                                                                                                                                                                                                                                                                                                                                                                                                                                                                                                                                                                                                                                                                                                                                                                                                                                                                                                                                                                                                                                                                                                                                                                                                                                                                                                                                                                                                                                                                                                                                                                                                                                                                                                                                                                                                                                                                                                                                                                                                                                                                                                                                                                                                       |
| <p>Amino acids residues changes between both ZIKV strains. Marked in red within sequences.<br/><br/>From ZIKV-PR → ZIKV-PF</p>                                                 | <p>T<sub>80</sub> → I (Capsid)<br/>G<sub>892</sub> → W (NS1)<br/>V<sub>2611</sub> → A (NS5)<br/>V<sub>2634</sub> → M (NS5)</p>                                                                                                                                                                                                                                                                                                                                                                                                                                                                                                                                                                                                                                                                                                                                                                                                                                                                                                                                                                                                                                                                                                                                                                                                                                                                                                                                                                                                                                                                                                                                                                                                                                                                                                                                                                                                                                                                                                                                                                                                                                                                                                                                                                                                                                                                                                                                                                                                                                                                                                                                                                                                                                                                                                                                                                                                                                                                                                                                                                                                                                                                                                                                                                                                                                                                                                                                                                                                                                                                                                                                                                                                                                                                                                                                                                                                                                                                                                                                                                                                                                                                                                                                                                                                                                                                                                                                                                                                                                                                                                                                                                                                                                                                                                                                                                                                                                                                                                                                                                                                                                                                                                                                                         |
| <p>ZIKV-PRVABC59<br/><br/>Accession number:<br/>KX377337</p>                                                                                                                   | <p>MKNPKKKSGGFRIVNMLKRGVARVSPFGGLKRLPAGLLLGHPIRMVLA<br/>LAF<sup>R</sup>LR<sup>F</sup>TAIKPSLGLINRWG<sup>S</sup>VGKKEAME<sup>R</sup>IKKF<sup>F</sup>KKDLAAMLR<sup>I</sup>INARKE<br/>KKRRGADTSVGI<sup>V</sup>GLLLTTAMAAEV<sup>T</sup>RRGSAYMYLDRNDAGEAIS<sup>F</sup>P<sup>T</sup>T<br/>LGMNKC<sup>Y</sup>IQIMDLGHMCDATMSYEC<sup>P</sup>MLDEGVE<sup>P</sup>DDVDCWCNTT<sup>S</sup>TWVVY<br/>GTCH<sup>H</sup>KKGEARRSRAV<sup>T</sup>LPSHSTRKLQ<sup>T</sup>RSQTWLESREY<sup>T</sup>KHLIRVENW<br/>IFRN<sup>P</sup>PGFALAAAAIAWLLGSSTS<sup>S</sup>QKVIYLV<sup>M</sup>ILLIAPAYS<sup>I</sup>RCIGVSNRD<br/>FVEGMSGG<sup>T</sup>WVDV<sup>V</sup>LEHGGCV<sup>T</sup>VMAQDK<sup>P</sup>TVDIELV<sup>T</sup>TTVSNMAE<sup>V</sup>RSYC<br/>YEASIS<sup>D</sup>MASDSRC<sup>P</sup>TQGEAYLDKQSD<sup>T</sup>QYVCK<sup>R</sup>TLVDRGWNGCGL<sup>F</sup>GK<br/>GSLV<sup>T</sup>CAK<sup>F</sup>ACSK<sup>K</sup>MTG<sup>K</sup>SIQ<sup>P</sup>ENLE<sup>Y</sup>RIMLSVHGS<sup>Q</sup>HSGMIV<sup>N</sup>DTGHET<br/>DENRAK<sup>V</sup>EIT<sup>P</sup>NSPRAE<sup>A</sup>T<sup>L</sup>GGF<sup>G</sup>SLGLDCE<sup>P</sup>RTGLDFSD<sup>L</sup>Y<sup>L</sup>TMN<sup>N</sup>KH<br/>WLVHKE<sup>W</sup>FHD<sup>I</sup>PLPWHAGAD<sup>T</sup>G<sup>T</sup>PHWNNKEAL<sup>V</sup>E<sup>F</sup>KDAHAK<sup>R</sup>Q<sup>T</sup>VVVLGS<br/>QEGAVHTALAGALEAEMD<sup>G</sup>AKGRLSSGHLK<sup>C</sup>RLKMD<sup>K</sup>LRLK<sup>G</sup>VSYSL<sup>C</sup>TA<br/>A<sup>F</sup>T<sup>F</sup>TK<sup>I</sup>PAETLHGT<sup>V</sup>TVEV<sup>Q</sup>YAG<sup>T</sup>DG<sup>P</sup>CKVPAQMA<sup>V</sup>DMQ<sup>T</sup>LT<sup>F</sup>VGR<sup>L</sup>IT<br/>ANP<sup>V</sup>ITESTENSK<sup>M</sup>MLELD<sup>P</sup>PF<sup>G</sup>DSYIVIG<sup>V</sup>GE<sup>K</sup>KITHH<sup>W</sup>HRSG<sup>S</sup>TIG<sup>K</sup>A<br/>FEAT<sup>V</sup>RGAK<sup>R</sup>MAV<sup>L</sup>GDTA<sup>W</sup>DFG<sup>S</sup>VGGALNSL<sup>G</sup>KGIHQ<sup>I</sup>F<sup>G</sup>AA<sup>F</sup>KS<sup>L</sup>F<sup>G</sup>GM<br/>SW<sup>F</sup>S<sup>Q</sup>ILIG<sup>T</sup>LLMW<sup>L</sup>GLN<sup>T</sup>KN<sup>G</sup>SIS<sup>L</sup>MCLAL<sup>G</sup>GV<sup>L</sup>IF<sup>L</sup>STAV<sup>S</sup>AD<sup>V</sup>G<sup>C</sup>SV<br/>DF<sup>S</sup>SK<sup>E</sup>TRC<sup>G</sup>TGV<sup>F</sup>VY<sup>N</sup>DVEAW<sup>R</sup>DRY<sup>K</sup>YHP<sup>D</sup>SP<sup>R</sup>RLAAAV<sup>K</sup>QAWED<sup>G</sup>IC<sup>G</sup><br/>ISS<sup>V</sup>SR<sup>M</sup>ENIM<sup>W</sup>RSVE<sup>G</sup>ELNA<sup>I</sup>LEENG<sup>V</sup>QL<sup>T</sup>VV<sup>V</sup>G<sup>S</sup>V<sup>K</sup>N<sup>P</sup>M<sup>R</sup>GP<sup>Q</sup>RL<sup>P</sup>V<br/>PVNEL<sup>P</sup>HG<sup>W</sup>KAW<sup>G</sup>KS<sup>Y</sup>F<sup>V</sup>RAAK<sup>T</sup>N<sup>N</sup>SF<sup>V</sup>DG<sup>D</sup>TL<sup>K</sup>EC<sup>P</sup>LKH<sup>R</sup>AW<sup>N</sup>S<sup>F</sup>VE<br/>DH<sup>G</sup>F<sup>G</sup>V<sup>F</sup>H<sup>T</sup>SV<sup>W</sup>LK<sup>V</sup>RED<sup>S</sup>LECD<sup>P</sup>AV<sup>I</sup>GTAV<sup>K</sup>G<sup>K</sup>EAV<sup>H</sup>SD<sup>L</sup>GY<sup>W</sup>IE<sup>S</sup>E<sup>K</sup><br/>ND<sup>T</sup>W<sup>R</sup>LK<sup>R</sup>AHL<sup>I</sup>EM<sup>K</sup>TCE<sup>W</sup>PK<sup>S</sup>HTL<sup>W</sup>TD<sup>G</sup>IE<sup>S</sup>DL<sup>I</sup>PK<sup>S</sup>L<sup>A</sup>GL<sup>P</sup>L<sup>S</sup>H<sup>H</sup>NT<br/>REG<sup>Y</sup>RT<sup>Q</sup>M<sup>K</sup>GP<sup>W</sup>HSE<sup>E</sup>LE<sup>I</sup>R<sup>F</sup>E<sup>E</sup>CP<sup>G</sup>TK<sup>V</sup>HVE<sup>E</sup>TC<sup>G</sup>TR<sup>G</sup>PS<sup>L</sup>R<sup>S</sup>T<sup>A</sup>SG<sup>R</sup><br/>VIE<sup>E</sup>W<sup>C</sup>CRE<sup>C</sup>T<sup>M</sup>PP<sup>L</sup>S<sup>F</sup>RA<sup>K</sup>D<sup>G</sup>CW<sup>Y</sup>G<sup>M</sup>E<sup>I</sup>R<sup>P</sup>R<sup>K</sup>E<sup>P</sup>ES<sup>N</sup>L<sup>V</sup>R<sup>S</sup>M<sup>V</sup>TAG<sup>S</sup>T<sup>D</sup><br/>HMD<sup>H</sup>F<sup>S</sup>L<sup>G</sup>V<sup>L</sup>VILL<sup>M</sup>VQ<sup>E</sup>GL<sup>K</sup>K<sup>R</sup>MT<sup>T</sup>K<sup>I</sup>IIST<sup>S</sup>MA<sup>V</sup>L<sup>V</sup>AM<sup>I</sup>L<sup>G</sup>GF<sup>S</sup>MS<sup>D</sup>L<br/>AK<sup>L</sup>A<sup>I</sup>LM<sup>G</sup>AT<sup>F</sup>AEM<sup>N</sup>TGG<sup>D</sup>V<sup>A</sup>HL<sup>A</sup>LIA<sup>A</sup>F<sup>K</sup>VR<sup>P</sup>ALL<sup>V</sup>S<sup>F</sup>I<sup>F</sup>RAN<sup>W</sup>T<sup>P</sup>RES<br/>ML<sup>L</sup>L<sup>A</sup>L<sup>A</sup>S<sup>C</sup>LL<sup>Q</sup>TA<sup>I</sup>SA<sup>L</sup>E<sup>G</sup>DL<sup>M</sup>V<sup>L</sup>ING<sup>F</sup>AL<sup>A</sup>WL<sup>A</sup>IRAM<sup>V</sup>V<sup>P</sup>RT<sup>D</sup>NIT<sup>L</sup>AI<br/>LAAL<sup>T</sup>PL<sup>A</sup>R<sup>G</sup>TLL<sup>V</sup>AW<sup>R</sup>AG<sup>L</sup>AT<sup>C</sup>GG<sup>F</sup>ML<sup>L</sup>SL<sup>K</sup>G<sup>K</sup>GS<sup>V</sup>KK<sup>N</sup>LP<sup>F</sup>VM<sup>A</sup>L<sup>G</sup>L<sup>T</sup><br/>AV<sup>R</sup>L<sup>V</sup>DP<sup>I</sup>N<sup>V</sup>V<sup>G</sup>LLLL<sup>L</sup>TR<sup>S</sup>G<sup>K</sup>RS<sup>W</sup>PP<sup>S</sup>E<sup>V</sup>L<sup>T</sup>AV<sup>G</sup>L<sup>I</sup>CAL<sup>A</sup>GG<sup>F</sup>AK<sup>A</sup>DIEM<br/>AG<sup>P</sup>MAAV<sup>G</sup>LL<sup>I</sup>V<sup>S</sup>Y<sup>V</sup>V<sup>S</sup>G<sup>K</sup>S<sup>V</sup>DM<sup>Y</sup>IER<sup>A</sup>GD<sup>I</sup>T<sup>W</sup>E<sup>K</sup>DA<sup>E</sup>VT<sup>G</sup>NS<sup>P</sup>RL<sup>D</sup>VAL</p> |

|                                                             |                                                                                                                                                                                                                                                                                                                                                                                                                                                                                                                                                                                                                                                                                                                                                                                                                                                                                                                                                                                                                                                                                                                                                                                                                                                                                                                                                                                                                                                                                                                                                                                                                                                                                                                                                                                                                                                                                                                                                                                                                                                                                                                                                                                                                                                                                                 |
|-------------------------------------------------------------|-------------------------------------------------------------------------------------------------------------------------------------------------------------------------------------------------------------------------------------------------------------------------------------------------------------------------------------------------------------------------------------------------------------------------------------------------------------------------------------------------------------------------------------------------------------------------------------------------------------------------------------------------------------------------------------------------------------------------------------------------------------------------------------------------------------------------------------------------------------------------------------------------------------------------------------------------------------------------------------------------------------------------------------------------------------------------------------------------------------------------------------------------------------------------------------------------------------------------------------------------------------------------------------------------------------------------------------------------------------------------------------------------------------------------------------------------------------------------------------------------------------------------------------------------------------------------------------------------------------------------------------------------------------------------------------------------------------------------------------------------------------------------------------------------------------------------------------------------------------------------------------------------------------------------------------------------------------------------------------------------------------------------------------------------------------------------------------------------------------------------------------------------------------------------------------------------------------------------------------------------------------------------------------------------|
|                                                             | <p>DESGDFSLVEDDGPMPREIILKVVLMTICGMNPITAIFFAAGAWYVYVKTG<br/> KRSALWDVPAPKEVKKGETTDGVYRVMTRRLLGSTQVGVGMQEGVFHT<br/> MWHVTKGSALRSGEGRLLDPYWGDKQDLVSYCGPWKLDAAWDGHSEVQLL<br/> AVPPGERARNIQTLPGIFKTKDGDIGAVALDYPAGTSGSPILDKCGRVIG<br/> LYNGVVIKNGSYVSAITQGRREEETPVECFEFSMLKKKQLTVLDDLHPGA<br/> GKTRRVLPEIVREAIKTRRLRTVILAPTRVVAEMEEALRGLPVRMYMTTAV<br/> NVTHSGTEIVDLMCHATFTSRLLQPIRVPNYNLYIMDEAHFTDPSSIAAR<br/> GYISTRVEMGEAAAIFMTATPPGTRDAFPDSNSPIMDTEVEVPERAWSSG<br/> FDWVTDHSGKTVWFVPSVRNGNEIAACLTKAGKRVIQLSRKTFETEFQKT<br/> KHQEWDFVVTTDISEMGANFKADRVIDSRRLKPVILDGERVILAGPMPV<br/> THASAAQRRGRIGRNPKNPGDEYLYGGGCAETDEDHAHWLEARMLLDNIY<br/> LQDGLIASLYRPEADKVAIEGEFKLRTQKRTFVELMKRGDLPVWLAYQ<br/> VASAGITYTDRRWCFDGTNNNTIMEDSVPAEVTWRHGEKRVLPKRWMDAR<br/> VCSDHAALKSFKEFAAGKRGAAFGVMEALGTLPGHMTERFQEAIDNLAVL<br/> MRAETGSRPYKAAAAQLPETLETIMLLGLLGTVSLGIFVLMRNKIGIKM<br/> GFGMVTLGASAWLMWLSEIEPARIACVLIIVFLLLVLVLIPEPEKQVSPQD<br/> NQMAIIMVAVGLLGLITANELGWLERTKSDLSHLMGRREEGATIGFSMD<br/> IDLRPASAWAIYAALTTFITPAVQHAVTTSYNNYSLMAMATQAGVLFMG<br/> KGMPFYAWDFGVPLLMIGCYSQTLPLTLIVAILLVVAHYMYLIPGLQAAA<br/> ARAAQKRTAAGIMKNPVVDGIVVTDIDTMTIDPQVEKKMGQVLLIAVAVS<br/> SAILSRATAWGGEAGALITAATSTLWEGSPNKYWNSTATSLCNIFRGSY<br/> LAGASLIYTVTRNAGLVKRRGGGTGETLGEKWKARLNQMSALEFYSYKKS<br/> GITEVCREEARRALKDGVATGGHAVSRGSAKLRWLVERGYLQPYGKVIDL<br/> GCGRGGWSYYVATIRKVQEVKGYTKGGPGHEEPVLLVQSYGWNIVRLKSGV<br/> DVFHMAAEPDCTLLCDIGESSSSPEVEEARTLRVLSMVGDWLEKRPAGFC<br/> IKVLCPTYTSTMMETLERLQRRYGGGLVRVPLSRNSTHEMYWVSGAKSNTI<br/> KSVSTTSQLLLGRMDGPRRPVKYEEVDNLGSGTRAVVSCAEAPNMKIIGN<br/> RIERIRSEHAETWFFDENHPYRTWAYHGSYEAPTQGSASSLINGVVRLLS<br/> KPWDVVTGVTGIAMTDTTPYGQQRVFEKEVDTRVPDQEGTRQVMSMVSS<br/> WLWKELGKHKRPRVCTKEEFINKVRSNAALGAI FEEKEWKTAVEAVNDP<br/> RFWALVDKEREHHLRGEQCQSCVYNMMGKREKKQGEFGKAKGSAIWMWL<br/> GARFLEFEALGF LNEDHWMGRENSGGGVEGLGLQRLGYVLEEMSRI PGG<br/> MYADDTAGWDTRI SRFDLENEALITNQMEKGHRALALAI IKYTYQNKVVK<br/> VLRPAEKGKTVMIDI SRQDQRGSGQVVTYALNTFTNLVQVQVIRNMEAEV<br/> LEMQDLWLLRRSEKVTNWLQSNQWDRKRMVAVSGDDCVVKPIDDRFAHAL<br/> RFLNDMGKVRKDTQEWKPTGWDNWEVFPFCSHHFNKLHLKDGRSIVVPC<br/> RHQDELIGRARVSPGAGWSIRETACLAKSYAQMWQLLYFHRRDLRLMANA<br/> ICSSVPVDWVPTGRTTWSIHGKGEWMTTEDMLVWNRVWIEENDHMDKT<br/> PVTKWTDIPYLGKREDLWCGSLIGHRPRTWAENIKNTVNMVRRIGDDE<br/> KYMDYLSSTQVRYLGEESTPGVL</p> |
| <p>ZIKV H/PF2013</p> <p>Accession number:<br/> KJ776791</p> | <p>MKNPKKSGGFRIVNMLKRGVARVSPFGGLKRLPAGLLLGHGPIRMVLA<br/> LAFRLRFTAIPSLGLINRWGVSVGKKEAMEIKKFKKDLAAMLRIINARKE<br/> KKRRGADTSVGIVGLLLTTAMAAEVTRRGSAYMYLDRNDAGEAISFPPT<br/> LGMNKCYYIQIMDLGHMCDATMSYECPLMDEGVEPDDVDCWCNTTSTWVY<br/> GTCHHKKGEARRSRAVTLPSHSTRKLQTRSQTWLESREYTKHLIRVENW<br/> IFRNPGFALAAAAIAWLLGSSSTSQKVIYLVMIILLIAPAYSIRCIGVSNRD<br/> FVEGMSGGTWVDVLEHGGCVTVMAQDKPTVDIELVTTTVSNMAEVRSYC<br/> YEASISDMASDSRCPTQGEAYLDKQSDTQYVCKRTLVDGRGWNGCGLFGK<br/> GSLVTCAKFACSKKMTGKSIQPENLEYRIMLSVHGSQHSGLMIVNDTGHE<br/> DENRAKVEITPNSPRAEATLGGFGLDCEPRTGLDFSDLYLTMNNKH<br/> WLVHKEWFHDIPLPWHAGADTGTPHWNNKEALVEFKDAHAKRQTVVVLGS<br/> QEGAVHTALAGALEAEMDGAKGRLSSGHLKCRKLMKDLRLKGVSYSLCTA<br/> AFTFTKI PAETLHGTVTVEVQYAGTDGPKVPAQMAVDMQTLTPVGRLLIT<br/> ANPVI TESTENSKMMLELDPPFGDSYIVIGVGEKKITHHWHRSGSTIGKA<br/> FEATVRGAKRMAVLGDTAWDFGVS GGALNSLGKGIHQIFGAAFKSLFGGM<br/> SWFSQILIGTLLMWLGLNTKNGSISLMCLALGGVLI FLSTAVSADVGCSSV<br/> DFSKKETRCGTGVFVYNDVEAWRDYKYHPDSRRLLAAAVKQAWEDGICG</p>                                                                                                                                                                                                                                                                                                                                                                                                                                                                                                                                                                                                                                                                                                                                                                                                                                                                                                                                                                                                                                                                                                                                                                                                                                                                                                          |

ISSVSRMENIMWRSVEGELNATILEENGVQLTVVVGSVKNPMPGRGPQRLPV  
PVNELPHGWKAWGKSYFVRAAKTNNFVVDGDTLKECPLKHRAWNSFLVE  
DHGFGVFHTSVWLKVREDSLECDPAVIGTAVKGEAVHSDLGYWIESEK  
NDTWRLKRAHLIEMKTCEWPKSHTLWTDGIEESDLIIPKSLAGPLSHHNT  
REGYRTQMKGPDHSELEIRFECEPGTKVHVEETCGTRGPSLRSTASGR  
VIEEWCCRECTMPPLSFRAKDGWCYGMIEIRPRKEPESNLVRSMTAGSTD  
HMDHFSLGLVIVILLMVQEGLLKRMTTKIIISTSMAVLVAMILGGFSMSDL  
AKLAILMGATFAEMNTGGDVAHLALIAAFKVRPALLVSFIFRANWTPRES  
MLLALASCLLQTAISALEGDLMLVINGFALAWLAIRAMVVPRTDNITLAI  
LAALTPLARGTLLVAWRAGLATCGGFMLLSLKKGKSVKKNLFPVMALGLT  
AVRLVDPINVVGLLLLTRSGKRSWPPSEVLTAVGLICALAGGFADIEAM  
AGPMAAVGLLIVSYVVSJKSVDMYIERAGDITWEKDAEVTGANSRPLDVAL  
DESGDFSLVEDDGGPPMREIILKVVLMTICGMNPIAIPFAAGAWVYVVTG  
KRSGALWDVPAPKEVKKGETTDGVYRVMTRRLLGSTQVGVGVQEGVFHT  
MWHVTKGSALRSGEGRLDPYWGDVKQDLVSYCGPWKLDAAWDGHSEVQLL  
AVPPGERARNIQTLPGIFKTKDGDIGAVALDYPAGTSGSPIIDKCGRVIG  
LYGNGVVIKNGSYVSAITQGRREEETPVECFEPSMLKKKQLTVLDDLHPGA  
GKTRRVLPDIVREAIKTRLRVILAPTRVVAEMEEALRGLPVRYMTTAV  
NVTHSGTEIVDLMCHATFTSRLLQPIRVPNYNLYIMDEAHFTDPSSIAAR  
GYISTRVEMGEAAAIFMTATPPGTRDAFPDSNSPIMDTEVEVPERAWSSG  
FDWVTDHSGKTVWFVPSVRNGNEIAACLTKAGKRVIQLSRKTFETEFQKT  
KHQEWDFVVTDI SEMGANFKADRVIDSRRLKPVILDGERVILAGPMPV  
THASAAQRRGRIGRNPKNKPGDEYLYGGCAETDEDHAHWLEARMLLDNIY  
LQDGLIASLYRPEADKVAIEGEFKLRTQQRKTFVELMKRGDLPVWLAYQ  
VASAGITYTDRRWCDFDGTNNNTIMEDSVPAEVWTRHGEKRVLKPWRMDAR  
VCSHAALKSFKEFAAGKRGAAFGVMEALGTLPGHMTERFQEAIDNLAVL  
MRAETGSRPYKAAAAQLPETLETIMLLGLLGTVSLGIFVLMRNKIGIKM  
GFGMVTLGASAWLMWLSEIEPARIACVLIVVFLLLVLIPEPEKQORSPQD  
NQMAIIMVAVGLLGLITANELGWLERTKSDLSHLMGRREEGATIGFSMD  
IDLRPASAWAIYAALTTFITPAVQHAVTTSYNNYSLMAMATQAGVLFMG  
KGMPPYAWDFGVPLLMGCYSQLTPLTLIVAILLVAHYMYLIPGLQAAA  
ARAAQKRTAAGIMKNPVVDGIVVTDIDTMTIDPQVEKKMGQVLLI AVAVS  
SAILSRATAWGGEAGALITAATSTLWEGSPNKYWNSSSTATSLCNI FRGSY  
LAGASLIYTVTRNAGLVKRRGGGTGETLGEKWKARLNQMSALEFYSYKKS  
GITEVCREEARRALKDGVATGGHAVSRGSAKLRWLVERGYLQPYGKVIDL  
GCGRGGWSYYAATIRKVQEVKGYTKGGPGHEEPMLVQSYGWNIVRLKSGV  
DVFHMAAEPDITLLCDIGESSSSPEVEEARTLRVLSMVGDWLEKRPAGFC  
IKVLCPYTSTMMETLERLQRRYGGGLVRVPLSRNSTHEMYWVSGAKSNTI  
KSVSTTSQLLLGRMDGPRRPVKYEEDVNLGSGTRAVVSCAEAPNMKIIGN  
RIERIRSEHAETWFFDENHPYRTWAYHGSYEAPTQGSASSLINGVVRLLS  
KPWDVVTGVTGIAMTDTTPYGQQRVFKEKVDTRVPDQEGTRQVMSMVSS  
WLWKELGKHKRPRVCTKEEFINKVRSNAALGAI FEEEEKWKTAVEAVNDP  
RFWALVDKEREHHLRGEQCQSCVYNMMGKREKKQGEFGKAKGSRAIWMWL  
GARFLEFEALGFLNEDHWMGRENSGGGVEGLGLQRLGYVLEEMSRIPGGR  
MYADDTAGWDTRISRFDLENEALITNQMEKGHRALALAIKYTYQNKVVK  
VLRPAEKGKTVMIDIISRQDQRGSGQVVTYALNTFTNLVVQLIRNMEAEV  
LEMQDLWLLRRSEKVTNWLQSNQWDRLLKRMVAVSGDDCVVKPIDDRFAHAL  
RFLNDMGKVRKDTQEWKPSGTWGNWEEVFPCHHFNKLLHLKDGRSIVVPC  
RHQDELIGRARVSPGAGWSIRETACLAKSYAQMWQLLYFHRRDLRLMANA  
ICSSVPVDWVPTGRTTWSIHGKGEWMTTEDMLVVWNRVWIEENDHMDKT  
PVTKWTDIPYLGKREDLWCGSLIGHRPRTTWAENIKNTVMVRRIGDEE  
KYMDYLISTQVRYLGEEGSTPGVL



**Supplementary Table 2 | Antibody panel for Immunophenotyping.**

| Cell Subset | Ab     | Clone     | Dye         | Company      | Cat. #      |
|-------------|--------|-----------|-------------|--------------|-------------|
| B / T cells | CD20   | 2H7       | PacificBlue | BioLegend    | 302328      |
|             | CD3    | 10D12     | PE-Vio770   | Miltenyi     | 130-104-202 |
|             | CD4    | M-T466    | PerCP       | Miltenyi     | 130-101-147 |
|             | CD8    | BW135/80  | VioGreen    | Miltenyi     | 130-096-902 |
|             | CD28   | 15E8      | APC-Vio770  | Miltenyi     | 130-104-278 |
|             | CD69   | FN50      | PE          | BD           | 557050      |
|             | CD95   | DX2       | APC         | Miltenyi     | 130-092-417 |
|             | Ki67   | B56       | Alexa 488   | BD           | 558616      |
| NK          | CD3    | 10D12     | APC         | Miltenyi     | 130-091-998 |
|             | CD16   | VEP13     | APC-Vio770  | Miltenyi     | 130-096-655 |
|             | CD56   | AF12-7H3  | PE          | Miltenyi     | 130-090-755 |
|             | CD14   | M5E2      | V500        | BD           | 561391      |
|             | CD8    | SK1       | BV421       | BioLegend    | 344748      |
|             | NKp30  | AF29-4D12 | PE-Vio770   | Miltenyi     | 130-104-116 |
|             | NKp46  | BAB281    | PC5         | Beck-Coulter | A66902      |
|             | NK2GA  | REA110    | FITC        | Miltenyi     | 130-098-818 |
| DC          | CD20   | 2H7       | FITC        | BD           | 555622      |
|             | CD3    | SP34      |             | BD           | 556611      |
|             | CD14   | M5E2      |             | BD           | 555397      |
|             | CD16   | 3G8       |             | BD           | 555406      |
|             | NKG2A  | REA110    |             | Miltenyi     | 130-098-818 |
|             | CD8    | SK1       |             | BioLegend    | 344704      |
|             | HLA DR | REA 805   | VioGreen    | Miltenyi     | 130-111-795 |
|             | CD123  | 7G3       | APC         | BD           | 560087      |
|             | CD11c  | 3.9       | PE/Cy7      | BioLegend    | 301608      |

**Supplementary Table 3 | Antibody panel for T cell functional response assessment.**

| <b>Marker</b> | <b>Stain</b> | <b>Clone</b> | <b>Catalog Number</b> | <b>Vendor</b>   | <b>Dilution</b> |
|---------------|--------------|--------------|-----------------------|-----------------|-----------------|
| CD4           | PerCP-Cy-5.5 | SK3          | 566316                | BD Biosciences  | 1:25            |
| CD8 $\beta$   | PE           | ECD          | 6607123               | Beckman-Coulter | 1:20            |
| CD3           | Pacific Blue | SP34-2       | 558124                | BD Biosciences  | 1:30            |
| CD20          | BV605        | 2H7          | 563783                | BD Biosciences  | 1:30            |
| CD107a        | FITC         | H4A3         | 555800                | BD Biosciences  | 1:10            |
| CD28          | PE-Cy-5      | CD28.2       | 555730                | BD Biosciences  | 1:10            |
| CD95          | BV510        | DX2          | 305640                | Biologend       | 1:30            |
| IFN- $\gamma$ | APC          | B27          | 554702                | BD Biosciences  | 1:30            |
| TNF- $\alpha$ | PE-Cy-7      | Mab11        | 557647                | BD Biosciences  | 1:30            |

**Supplementary Table 4 | Peptide sequences for stimulation of T cell functional response.**

**Dengue Virus Type 2 Peptides**

| Peptide | Amino Acid Sequence     | Peptide | Amino Acid Sequence  | Peptide | Amino Acid Sequence |
|---------|-------------------------|---------|----------------------|---------|---------------------|
| 1       | MRCIGISNRDFVEGV         | 29      | AWLVHRQWFLDLPLPWL    | 57      | MRGAKRMAILGDTAWDF   |
| 2       | ISNRDFVEGVSGGSWVDI      | 30      | WFLDLPLWLPGADTQGSNW  | 58      | AILGDTAWDFGSLGGVF   |
| 3       | GVSGGSWVDIVLEHGSCV      | 31      | PGADTQGSNWIKETLV     | 59      | WDFGSLGGVFTSIGKALH  |
| 4       | DIVLEHGSCVTTMAKNK       | 32      | SNWIKETLVTFKNPHAK    | 60      | VFTSIGKALHQVFGAIY   |
| 5       | SCVTTMAKNKPTLDFELI      | 33      | LVTFKNPHAKKQDVVVL    | 61      | ALHQVFGAIYGAAFSGV   |
| 6       | NKPTLDFELIETEAKQPA      | 34      | HAKKQDVVVLGSQEGAMH   | 62      | AIYGAAFSGVSWIMKILI  |
| 7       | LIETEAKQPATLRKYCI       | 35      | VLGSQEGAMHTALTGA     | 63      | GVSWIMKILIGVIITWI   |
| 8       | KQPATLRKYCIEAKL         | 36      | GAMHTALTGATEIQM      | 64      | ILIGVIITWIGMNSR     |
| 9       | LRKYCIEAKLTNTTDSR       | 37      | ALTGATEIQMSSGNLLF    | 65      | IITWIGMNSRSTLSVSL   |
| 10      | KLTNTTDSRCPTQGEPSL      | 38      | IQMSSGNLLFTGHLKCRL   | 66      | SRSTLSVSLVLVGVVTL   |
| 11      | RCPTQGEPSLNEEQDKRF      | 39      | LFTGHLKCRLRMDKLQLK   | 67      | SLVLVGVVTLVYLGVMVQA |
| 12      | SLNEEQDKRFVCKHSMV       | 40      | RLRMDKLQLKGMSYSM     |         |                     |
| 13      | KRFVCKHSMVDRGWNGCG<br>L | 41      | LQLKGMSYSMCTGKFKVV   |         |                     |
| 14      | DRGWNGCGLFGKGGIV        | 42      | SMCTGKFKVVKEIAETQH   |         |                     |
| 15      | CGLFGKGGIVTCAMFTCK      | 43      | VVKEIAETQHGTIVIRV    |         |                     |
| 16      | IVTCAMFTCKKNMKGVV       | 44      | TQHGTIVIRVQYEGDGSPCK |         |                     |
| 17      | CKKNMKGVVQPENLEY        | 45      | VQYEGDGSPCKIPFEIM    |         |                     |
| 18      | KVVQPENLEYTIVITPH       | 46      | SPCKIPFEIMDLEKRHVL   |         |                     |
| 19      | LEYTIVITPHSGEEHAV       | 47      | IMDLEKRHVLRGLITV     |         |                     |
| 20      | TPHSGEEHAVGNDTGKH       | 48      | RHVLRGLITVNPVITEK    |         |                     |
| 21      | HAVGNDTGKHGKEIKI        | 49      | ITVNPVITEKDSPVNIEA   |         |                     |
| 22      | TGKHGKEIKITPQSSI        | 50      | EKDSPVNIEAEPFGDSY    |         |                     |
| 23      | EIKITPQSSITEAELTGY      | 51      | EAEPFGDSYIIIGV       |         |                     |
| 24      | SITEAELTGYGTVTM         | 52      | FGDSYIIIGVEPGQLKL    |         |                     |
| 25      | ELTGYGTVTMECSPRTGL      | 53      | IGVEPGQLKLNWFKK      |         |                     |
| 26      | TMECSPRTGLDFNEMVLL      | 54      | GQLKLNWFKKGSSIGQMI   |         |                     |
| 27      | GLDFNEMVLLQMENKAWL      | 55      | KKGSSIGQMIETMRGAK    |         |                     |
| 28      | LLQMENKAWLVHRQWFL       | 56      | MIETMRGAKRMAIL       |         |                     |

## Supplementary Table 4 | Continuation

### Zika Virus Envelope Peptides

| Peptide | Amino Acid Sequence | Peptide | Amino Acid Sequence  | Peptide | Amino Acid Sequence |
|---------|---------------------|---------|----------------------|---------|---------------------|
| ZIKV59  | IRCIGVSNRDFVEGM     | ZIKV87  | LSVHGSQHSQMIVND      | ZIKV115 | KGRLSSGHLKCR LKM    |
| ZIKV60  | VSNRDFVEGMSGGTW     | ZIKV88  | SQHSGMIVNDTGHET      | ZIKV116 | SGHLKCR LKMDKRLRL   |
| ZIKV61  | FVEGMSGGTWVDVVL     | ZIKV89  | MIVNDTGHETDENRA      | ZIKV117 | CRLKMDKRLRLKGVSY    |
| ZIKV62  | SGGTWVDVLEHGGC      | ZIKV90  | TGHETDENRAKVEIT      | ZIKV118 | DKLRLKGVSYSLCTA     |
| ZIKV63  | VDVLEHGGCVTVMA      | ZIKV91  | DENRAKVEITPNSPR      | ZIKV119 | KGVSYSLCTAAFTFT     |
| ZIKV64  | EHGGCVTVMAQDKPT     | ZIKV92  | KVEITPNSPRAEATL      | ZIKV120 | SLCTAAFTFTKIPAE     |
| ZIKV65  | VTVMAQDKPTVDIEL     | ZIKV93  | PNSPRAEATLGGFGS      | ZIKV121 | AFTFTKIPAE TLHGT    |
| ZIKV66  | QDKPTVDIELVTTTV     | ZIKV94  | AEATLGGFGSLGLDC      | ZIKV122 | KIPAE TLHGT VTTVEV  |
| ZIKV67  | VDIELVTTTVSNMAE     | ZIKV95  | GGFGSLGLDCEPRTG      | ZIKV123 | TLHGT VTTVEV QYAGT  |
| ZIKV68  | VTTTVSNMAEVRSYC     | ZIKV96  | LGLDCEPRTGLDFSD      | ZIKV124 | VTTVEV QYAGT DG PCK |
| ZIKV69  | SNMAEVRSYCYEASI     | ZIKV97  | EPRTGLDFSDLYYLT      | ZIKV125 | QYAGT DG PCK VPAQM  |
| ZIKV70  | VRSYCYEASISDMAS     | ZIKV98  | LDFSDLYYLT MN NKH    | ZIKV126 | DG PCK VPAQMAVDMQ   |
| ZIKV71  | YEASISDMASD SRCP    | ZIKV99  | LYYLT MN NKH WL VHK  | ZIKV127 | VPAQMAVDMQ TLTPV    |
| ZIKV72  | SDMASD SRCP TQGEA   | ZIKV100 | MN NKH WL VH KEW FHD | ZIKV128 | AVDMQ TLTPV GRLIT   |
| ZIKV73  | DSRCP TQGEA YL DKQ  | ZIKV101 | WL VH KEW FHD I PLW  | ZIKV129 | TLTPV GRLIT ANPVI   |
| ZIKV74  | TQGEA YL DKQ SDTQY  | ZIKV102 | EW FHD I PLW HAGAD   | ZIKV130 | GRLIT ANPVI TESTE   |
| ZIKV75  | YL DKQ SDTQY VCKRT  | ZIKV103 | I PLW HAGAD T GTPH   | ZIKV131 | ANPVI TESTE NSKMM   |
| ZIKV76  | SDTQY VCKRT LVDRG   | ZIKV104 | HAGAD T GTPH WNNKE   | ZIKV132 | TESTE NSKMM LE LDP  |
| ZIKV77  | VCKRT LVDRG WGNGC   | ZIKV105 | TGTPH WNNKE ALVEF    | ZIKV133 | NSKMM LE LDP PFGDS  |
| ZIKV78  | LVDRG WGNGC GLFGK   | ZIKV106 | WNNKE ALVEF KDAHA    | ZIKV134 | LE LDP PFGDS YIVIG  |
| ZIKV79  | WGNGC GLFGK GSLVT   | ZIKV107 | ALVEF KDAHA KRQTV    | ZIKV135 | PFGDS YIVIG VGEKK   |
| ZIKV80  | GLFGK GSLVT CAKFA   | ZIKV108 | KDAHA KRQTV VVLGS    | ZIKV136 | YIVIG VGEKK ITHHW   |
| ZIKV81  | GSLVT CAKFA CSKMM   | ZIKV109 | KRQTV VVLGS QEGAV    | ZIKV137 | VGEKK ITHHW HRSGS   |
| ZIKV82  | CAKFA CSKMTGKSI     | ZIKV110 | VVLGS QEGAV HTALA    | ZIKV138 | ITHHW HRSGS TIGKA   |
| ZIKV83  | CSKMTGKSI QPENL     | ZIKV111 | QEGAV HTALAGALEA     | ZIKV139 | HRSGS TIGKA FEATV   |
| ZIKV84  | TGKSI QPENLE YRIM   | ZIKV112 | HTALAGALEA EMDGA     | ZIKV140 | TIGKA FEATV RGA KR  |
| ZIKV85  | QPENLE YRIM LSVHG   | ZIKV113 | GALEA EMDGAKGR LS    | ZIKV141 | FEATV RGA KRMAV LG  |
| ZIKV86  | EYRIM LSVHGSQHSG    | ZIKV114 | EMDGAKGR LSSGHLK     | ZIKV142 | RGA KRMAV LGDTAWD   |

## Supplementary Table 4 | Continuation

| Peptide | Amino Acid Sequence |
|---------|---------------------|
| ZIKV143 | MAVLGDTAWDFGSVG     |
| ZIKV144 | DTAWDFGSVGALNS      |
| ZIKV145 | FGSVGGALNSLGKGI     |
| ZIKV146 | GALNSLGKGIHQIFG     |
| ZIKV147 | LGKGIHQIFGAAFKS     |
| ZIKV148 | HQIFGAAFKSLFGGM     |
| ZIKV149 | AAFKSLFGGMSWFSQ     |
| ZIKV150 | LFGGMSWFSQILIGT     |
| ZIKV151 | SWFSQILIGTLLMWL     |
| ZIKV152 | ILIGTLLMWLGLNTK     |
| ZIKV153 | LLMWLGLNTKNGSIS     |
| ZIKV154 | GLNTKNGSISLMCLA     |
| ZIKV155 | NGSISLMCLALGGVL     |
| ZIKV156 | LMCLALGGVLIFLST     |
| ZIKV157 | LGGVLIFLSTAVSAD     |
| ZIKV158 | IFLSTAVSADVGCSV     |
| ZIKV159 | AVSADVGCSVDFSKK     |

## Supplementary Table 4 | Continuation

### Zika Virus Non-Structural Peptides

| Peptide | Amino Acid Sequence | Peptide | Amino Acid Sequence | Peptide | Amino Acid Sequence |
|---------|---------------------|---------|---------------------|---------|---------------------|
| ZIKV160 | VGCSVDFSKKETRCG     | ZIKV188 | ECPLKHRAWSFLVE      | ZIKV216 | GTKVHVEETCGTRGP     |
| ZIKV161 | DFSKKETRCGTGVFV     | ZIKV189 | HRAWNSFLVEDHGFG     | ZIKV217 | VEETCGTRGPSLRST     |
| ZIKV162 | ETRCGTGVFVYNDVE     | ZIKV190 | SFLVEDHGFGVFHTS     | ZIKV218 | GTRGPSLRSTTASGR     |
| ZIKV163 | TGVFVYNDVEAWRDR     | ZIKV191 | DHGFGVFHTSVWLKV     | ZIKV219 | SLRSTTASGRVIEEW     |
| ZIKV164 | YNDVEAWRDRYKYHP     | ZIKV192 | VFHTSVWLKVREDYS     | ZIKV220 | TASGRVIEEWCCREC     |
| ZIKV165 | AWRDRYKYHPDSPRR     | ZIKV193 | VWLKVREDYSLECDP     | ZIKV221 | VIEEWCCRECTMPPL     |
| ZIKV166 | YKYHPDSPRRLAAAV     | ZIKV194 | REDYSLECDPAVIGT     | ZIKV222 | CCRECTMPPLSFRAK     |
| ZIKV167 | DSPRRLAAAVKQAWWE    | ZIKV195 | LECDPAVIGTAVKGGK    | ZIKV223 | TMPPLSFRAKDGCWY     |
| ZIKV168 | LAAAVKQAWEDGICG     | ZIKV196 | AVIGTAVKGEAVHS      | ZIKV224 | SFRAKDGCWYGMEIR     |
| ZIKV169 | KQAWEDGICGISSVS     | ZIKV197 | AVKGEAVHSDLGYW      | ZIKV225 | DGCWYGMEIRPRKEP     |
| ZIKV170 | DGICGISSVSRMENI     | ZIKV198 | EAVHSDLGYWIESEK     | ZIKV226 | GMEIRPRKEPESNLV     |
| ZIKV171 | ISSVSRMENIMWRSV     | ZIKV199 | DLGYWIESEKNDTWR     | ZIKV227 | PRKEPESNLVRSMT      |
| ZIKV172 | RMENIMWRSVEGELN     | ZIKV200 | IESEKNDTWRLKRAH     | ZIKV228 | ESNLVRSMTAGSTD      |
| ZIKV173 | MWRSVEGELNAILEE     | ZIKV201 | NDTWRLKRAHLIEMK     | ZIKV229 | RSMVTAGSTDHMDHF     |
| ZIKV174 | EGELNAILEENGVQL     | ZIKV202 | LKRAHLIEMKTCEWP     | ZIKV230 | AGSTDHMDHFSLGVL     |
| ZIKV175 | AILEENGVQLTVVVG     | ZIKV203 | LIEMKTCEWPKSHTL     | ZIKV231 | HMDHFSLGVLVILLM     |
| ZIKV176 | NGVQLTVVVGSVKNP     | ZIKV204 | TCEWPKSHTLWTDGI     | ZIKV232 | SLGVLVILLMVQEGL     |
| ZIKV177 | TVVVGSVKNPMWRGP     | ZIKV205 | KSHTLWTDGIEESDL     | ZIKV233 | VILLMVQEGLKKRMT     |
| ZIKV178 | SVKNPMWRGPQRLPV     | ZIKV206 | WTDGIEESDLIIPKS     | ZIKV234 | VQEGLKKRMTTKIII     |
| ZIKV179 | MWRGPQRLPVPVNEL     | ZIKV207 | EESDLIIPKSLAGPL     | ZIKV235 | KKRMTTKIIISTMA      |
| ZIKV180 | QRLPVPVNELPHGWK     | ZIKV208 | IIPKSLAGPLSHHNT     | ZIKV236 | TKIIISTMAVLVAM      |
| ZIKV181 | PVNELPHGWKAWGKS     | ZIKV209 | LAGPLSHHNTREGYR     | ZIKV237 | STSMAVLVAMILGGF     |
| ZIKV182 | PHGWKAWGKSYFVRA     | ZIKV210 | SHHNTREGYRTQMKG     | ZIKV238 | VLVAMILGGFMSSDL     |
| ZIKV183 | AWGKSYFVRAAKTNN     | ZIKV211 | REGYRTQMKGPWHSE     | ZIKV239 | ILGGFMSDLAKLAI      |
| ZIKV184 | YFVRAAKTNSFVVD      | ZIKV212 | TQMKGPWHSEELEIR     | ZIKV240 | SMSDLAKLAILMGAT     |
| ZIKV185 | AKTNSFVVDGDTLK      | ZIKV213 | PWHSEELEIRFECEP     | ZIKV241 | AKLAILMGATFAEMN     |
| ZIKV186 | SFVVDGDTLKECPLK     | ZIKV214 | ELEIRFECEPGTKVH     | ZIKV242 | LMGATFAEMNTGGDV     |
| ZIKV187 | GDTLKECPLKHRAWN     | ZIKV215 | FECEPGTKVHVEETC     | ZIKV243 | FAEMNTGGDVAHLAL     |

| Peptide | Amino Acid Sequence | Peptide | Amino Acid Sequence | Peptide | Amino Acid Sequence |
|---------|---------------------|---------|---------------------|---------|---------------------|
| ZIKV244 | TGGDVAHLALIAAFK     | ZIKV272 | DPINVVGLLLLTRSG     | ZIKV300 | YVKTGKRSGALWDVP     |
| ZIKV245 | AHLALIAAFKVRPAL     | ZIKV273 | VGLLLLTRSGKRSWP     | ZIKV301 | KRSGALWDVPAPKEV     |
| ZIKV246 | IAAFKVRPALLVSFI     | ZIKV274 | LTRSGKRSWPPSEVL     | ZIKV302 | LWDVPAPKEVKKGET     |
| ZIKV247 | VRPALLVSFIFRANW     | ZIKV275 | KRSWPPSEVLTAVGL     | ZIKV303 | APKEVKKGETTDGVY     |
| ZIKV248 | LVSFIFRANWTPRES     | ZIKV276 | PSEVLTAVGLICALA     | ZIKV304 | KKGETTDGVYRVMTR     |
| ZIKV249 | FRANWTPRESMLLAL     | ZIKV277 | TAVGLICALAGGFAK     | ZIKV305 | TDGVYRVMTRRLLGS     |
| ZIKV250 | TPRESMLLALASCLL     | ZIKV278 | ICALAGGFAKADIEM     | ZIKV306 | RVMTRRLLGSTQVGV     |
| ZIKV251 | MLLALASCLLQTAIS     | ZIKV279 | GGFAKADIEMAGPMA     | ZIKV307 | RLLGSTQVGVGVMQE     |
| ZIKV252 | ASCLLQTAISALEGD     | ZIKV280 | ADIEMAGPMAAVGLL     | ZIKV308 | TQVGVGVMQEGVFHT     |
| ZIKV253 | QTAISALEGDLMLVI     | ZIKV281 | AGPMAAVGLLIVSYV     | ZIKV309 | GVMQEGVFHTMWHVT     |
| ZIKV254 | ALEGDLMLVINGFAL     | ZIKV282 | AVGLLIVSYVVSJKS     | ZIKV310 | GVFHTMWHVTKGSAL     |
| ZIKV255 | LMVLINGFALAWLAI     | ZIKV283 | IVSYVVSJKSVDMYI     | ZIKV311 | MWHVTKGSALRSSEG     |
| ZIKV256 | NGFALAWLAIRAMVV     | ZIKV284 | VSKSVDMYIERAGD      | ZIKV312 | KGSALRSSEGRLDPY     |
| ZIKV257 | AWLAIRAMVVPRTDN     | ZIKV285 | VDMYIERAGDITWEK     | ZIKV313 | RSSEGRLDPYWGDKV     |
| ZIKV258 | RAMVVPRTDNITLAI     | ZIKV286 | ERAGDITWEKDAEVT     | ZIKV314 | RLDPYWGDKVQDLVS     |
| ZIKV259 | PRTDNITLAILAALT     | ZIKV287 | ITWEKDAEVTGNSPR     | ZIKV315 | WGDVKQDLVSYCGPW     |
| ZIKV260 | ITLAILAALTPLARG     | ZIKV288 | DAEVTGNSPRLDVAL     | ZIKV316 | QDLVSYCGPWKLDA      |
| ZIKV261 | LAALTPLARGTLLVA     | ZIKV289 | GNSPRLDVALDESGD     | ZIKV317 | YCGPWKLDAAWDGHS     |
| ZIKV262 | PLARGTLLVAWRAGL     | ZIKV290 | LDVALDESGDFSLVE     | ZIKV318 | KLDAAWDGHSEVQLL     |
| ZIKV263 | TLLVAWRAGLATCGG     | ZIKV291 | DESGDFSLVEDDGPP     | ZIKV319 | WDGHSEVQLLAVPPG     |
| ZIKV264 | WRAGLATCGGFMLLS     | ZIKV292 | FSLVEDDGPPMREII     | ZIKV320 | EVQLLAVPPGERARN     |
| ZIKV265 | ATCGGFMLLSLKGKG     | ZIKV293 | DDGPPMREIILKVVV     | ZIKV321 | AVPPGERARNIQTLP     |
| ZIKV266 | FMLLSLKGKGSVKKN     | ZIKV294 | MREIILKVVVMTICG     | ZIKV322 | ERARNIQTLPGIFKT     |
| ZIKV267 | LKGKGSVKKNLPPFVM    | ZIKV295 | LKVVVMTICGMNPIA     | ZIKV323 | IQTLPGIFKTKDGD      |
| ZIKV268 | SVKKNLPPFVMALGLT    | ZIKV296 | MTICGMNPIAIPFAA     | ZIKV324 | GIFKTKDGDIGAV       |
| ZIKV269 | LPFVMALGLTAVRLV     | ZIKV297 | MNPIAIPFAAGAWYV     | ZIKV325 | KDGDIGAVDYPAG       |
| ZIKV270 | ALGLTAVRLVDPINV     | ZIKV298 | IPFAAGAWYVYVKTG     | ZIKV326 | GAVALDYPAGTSGSP     |
| ZIKV271 | AVRLVDPINVVGLLL     | ZIKV299 | GAWYVYVKTGKRSGA     | ZIKV327 | DYPAGTSGSPILDKC     |

| Peptide | Amino Acid Sequence | Peptide | Amino Acid Sequence | Peptide | Amino Acid Sequence |
|---------|---------------------|---------|---------------------|---------|---------------------|
| ZIKV328 | TSGSPILDKCGRVIG     | ZIKV356 | IRVPNYNLYIMDEAH     | ZIKV384 | MGANFKADRVIDSRR     |
| ZIKV329 | ILDKCGRVIGLYGNG     | ZIKV357 | YNLYIMDEAHFTDPS     | ZIKV385 | KADRVIDSRRCLKPV     |
| ZIKV330 | GRVIGLYGNGVVIKN     | ZIKV358 | MDEAHFTDPSSIAAR     | ZIKV386 | IDSRRCLKPVILDGE     |
| ZIKV331 | LYGNGVVIKNGSYVS     | ZIKV359 | FTDPSSIAARGYIST     | ZIKV387 | CLKPVILDGERVILA     |
| ZIKV332 | VVIKNGSYVSAITQG     | ZIKV360 | SIAARGYISTRVEMG     | ZIKV388 | ILDGERVILAGPMPV     |
| ZIKV333 | GSYVSAITQGRREEE     | ZIKV361 | GYISTRVEMGEAAAI     | ZIKV389 | RVILAGPMPVTHASA     |
| ZIKV334 | AITQGRREEETPVEC     | ZIKV362 | RVEMGEAAAFMTAT      | ZIKV390 | GPMPVTHASAAQRRG     |
| ZIKV335 | RREEETPVECFEPSM     | ZIKV363 | EAAAFMTATPPGTR      | ZIKV391 | THASAAQRRGRIGRN     |
| ZIKV336 | TPVECFEPSMLKKKQ     | ZIKV364 | FMTATPPGTRDAFPD     | ZIKV392 | AQRRGRIGRNPNKPG     |
| ZIKV337 | FEPSMLKKKQLTVLD     | ZIKV365 | PPGTRDAFPDSNSPI     | ZIKV393 | RIGRNPNKPGDEYLY     |
| ZIKV338 | LKKKQLTVLDLHPGA     | ZIKV366 | DAFPDSNSPIMDTEV     | ZIKV394 | PNKPGDELYGGGCA      |
| ZIKV339 | LTVLDLHPGAGKTRR     | ZIKV367 | SNSPIMDTEVEVPER     | ZIKV395 | DEYLYGGGCAETDED     |
| ZIKV340 | LHPGAGKTRRVLPEI     | ZIKV368 | MDTEVEVPERAWSSG     | ZIKV396 | GGGCAETDEDHAHWL     |
| ZIKV341 | GKTRRVLPEIVREAI     | ZIKV369 | EVPERAWSSGFWDVVT    | ZIKV397 | ETDEDHAHWLEARNML    |
| ZIKV342 | VLPEIVREAIKTRLR     | ZIKV370 | AWSSGFDWVTDHSGK     | ZIKV398 | HAHWLEARNMLLDNIY    |
| ZIKV343 | VREAIKTRLRTVILA     | ZIKV371 | FDWVTDHSGKTWVWFV    | ZIKV399 | EARNMLLDNIYLQDGL    |
| ZIKV344 | KTRLRTVILAPTRVV     | ZIKV372 | DHSGKTWVWFVPSVRN    | ZIKV400 | LDNIYLQDGLIASLY     |
| ZIKV345 | TVILAPTRVVAEEME     | ZIKV373 | TVWVFPVSRNGNEIA     | ZIKV401 | LQDGLIASLYRPEAD     |
| ZIKV346 | PTRVVAEEMEEALRG     | ZIKV374 | PSVRNGNEIAACLK      | ZIKV402 | IASLYRPEADKVAAI     |
| ZIKV347 | AAEMEEALRGLPVRV     | ZIKV375 | GNEIAACLKAGKRV      | ZIKV403 | RPEADKVAIEGEFEK     |
| ZIKV348 | EALRGLPVRVYMTTAV    | ZIKV376 | ACLKAGKRVIQLSR      | ZIKV404 | KVAIEGEFEFLRTEQ     |
| ZIKV349 | LPVRVYMTTAVNVTHS    | ZIKV377 | AGKRVIQLSRKTFET     | ZIKV405 | EGEFLRTEQQRKTFV     |
| ZIKV350 | MTTAVNVTHSGTEIV     | ZIKV378 | IQLSRKTFETEFQKT     | ZIKV406 | LRTEQKTFVELMKR      |
| ZIKV351 | NVTHSGTEIVDLMCH     | ZIKV379 | KTFETEFQKTKHQEW     | ZIKV407 | RKTFVELMKRGDLPV     |
| ZIKV352 | GTEIVDLMCHATFTS     | ZIKV380 | EFQKTKHQEWDFVVT     | ZIKV408 | ELMKRGDLPVWLAYQ     |
| ZIKV353 | DLMCHATFTSRLLQP     | ZIKV381 | KHQEWDFVVTDDISE     | ZIKV409 | GDLPVWLAYQVASAG     |
| ZIKV354 | ATFTSRLLQPIRVPN     | ZIKV382 | DFVVTDDISEMGANF     | ZIKV410 | WLAYQVASAGITYTD     |
| ZIKV355 | RLLQPIRVPNYNLYI     | ZIKV383 | TDISEMGANFKADRV     | ZIKV411 | VASAGITYTDRRWCF     |



| Peptide | Amino Acid Sequence | Peptide | Amino Acid Sequence | Peptide | Amino Acid Sequence |
|---------|---------------------|---------|---------------------|---------|---------------------|
| ZIKV412 | ITYDRRWCFDGTN       | ZIKV440 | GIGKMGFGMVTLGAS     | ZIKV468 | LMAMATQAGVLFMG      |
| ZIKV413 | RRWCFDGTNNTIME      | ZIKV441 | GFGMVTLGASAWLMW     | ZIKV469 | TQAGVLFMGKGMPPF     |
| ZIKV414 | DGTTNNTIMEDSVPA     | ZIKV442 | TLGASAWLMWLSEIE     | ZIKV470 | LFGMGKGMPPFYAWDF    |
| ZIKV415 | NTIMEDSVPAEVWTR     | ZIKV443 | AWLMWLSEIEPARIA     | ZIKV471 | KGMPFYAWDFGVPLL     |
| ZIKV416 | DSVPAEVWTRHGEKR     | ZIKV444 | LSEIEPARIACVLIV     | ZIKV472 | YAWDFGVPLLIGCY      |
| ZIKV417 | EVWTRHGEKRVLKPR     | ZIKV445 | PARIACVLIVVFLLL     | ZIKV473 | GVPLLIGCYSQLTP      |
| ZIKV418 | HGEKRVLKPRWMDAR     | ZIKV446 | CVLIVVFLLLVVLIP     | ZIKV474 | MIGCYSQLTPLTLIV     |
| ZIKV419 | VLKPRWMDARVCS DH    | ZIKV447 | VFLLLVLIPEPEKQ      | ZIKV475 | SQLTPLTLIVAIILL     |
| ZIKV420 | WMDARVCS DHAALKS    | ZIKV448 | VVLIPEPEKQRSPQD     | ZIKV476 | LTLIVAIILLVAHYM     |
| ZIKV421 | VCS DHAALKSFKEFA    | ZIKV449 | EPEKQRSPQDNQMAI     | ZIKV477 | AIILLVAHYMYLIPG     |
| ZIKV422 | AALKSFKEFAAGKRG     | ZIKV450 | RSPQDNQMAIIMVA      | ZIKV478 | VAHYMYLIPGLQAAA     |
| ZIKV423 | FKEFAAGKRGAAFV      | ZIKV451 | NQMAIIMVAVGLLG      | ZIKV479 | YLIPGLQAAAARAAQ     |
| ZIKV424 | AGKRGAAFVMEALG      | ZIKV452 | IIMVAVGLLGLITAN     | ZIKV480 | LQAAAARAAQKRATA     |
| ZIKV425 | AAFVMEALGTLPGH      | ZIKV453 | VGLLGLITANELGWL     | ZIKV481 | ARAAQKRATAAGIMKN    |
| ZIKV426 | MEALGTLPGHMTERF     | ZIKV454 | LITANELGWLERTKS     | ZIKV482 | KRTAAGIMKNPVVDG     |
| ZIKV427 | TLPGHMTERFQE AID    | ZIKV455 | ELGWLERTKSDL SHL    | ZIKV483 | GIMKNPVVDGIVVTD     |
| ZIKV428 | MTERFQE AIDNLAVL    | ZIKV456 | ERTKSDL SHLMGRRE    | ZIKV484 | PVVDGIVVTDIDTMT     |
| ZIKV429 | QE AIDNLAVLMRAET    | ZIKV457 | DL SHLMGRREEGATI    | ZIKV485 | IVVTDIDTMTIDPQV     |
| ZIKV430 | NLAVLMRAETGSRPY     | ZIKV458 | MGRREEGATIGFSMD     | ZIKV486 | IDTMTIDPQVEKKMG     |
| ZIKV431 | MRAETGSRPYKAAAA     | ZIKV459 | EGATIGFSMDIDLRP     | ZIKV487 | IDPQVEKKMGQVLLI     |
| ZIKV432 | GSRPYKAAAAQLPET     | ZIKV460 | GFSMDIDLRPASAWA     | ZIKV488 | EKKMGQVLLIAVAVS     |
| ZIKV433 | KAAAAQLPETLETIM     | ZIKV461 | IDLRPASAWAIYAAL     | ZIKV489 | QVLLIAVAVSSAILS     |
| ZIKV434 | QLPETLETIMLLGLL     | ZIKV462 | ASAWAIYAALTTFIT     | ZIKV490 | AVAVSSAILSRTAWG     |
| ZIKV435 | LETIMLLGLLGTVSL     | ZIKV463 | IYAALTTFITPAVQH     | ZIKV491 | SAILSRTAWGWGEAG     |
| ZIKV436 | LLGLLGTVSLGIFV      | ZIKV464 | TTFITPAVQHAVTTS     | ZIKV492 | RTAWGWGEAGALITA     |
| ZIKV437 | GTVSLGIFVLMRNK      | ZIKV465 | PAVQHAVTTSYNNYS     | ZIKV493 | WGEAGALITAATSTL     |
| ZIKV438 | GIFVLMRNKGIGKM      | ZIKV466 | AVTTSYNNYSLMAMA     | ZIKV494 | ALITAATSTLWEGSP     |
| ZIKV439 | LMRNKGIGKMGFGMV     | ZIKV467 | YNNYSLMAMATQAGV     | ZIKV495 | ATSTLWEGSPNKYWN     |

| Peptide | Amino Acid Sequence | Peptide | Amino Acid Sequence | Peptide | Amino Acid Sequence |
|---------|---------------------|---------|---------------------|---------|---------------------|
| ZIKV496 | WEGSPNKYWNSSTAT     | ZIKV524 | KVQEVKGYTKGGPGH     | ZIKV552 | TSQLLLGRMDGPRRP     |
| ZIKV497 | NKYWNSSTATSLCNI     | ZIKV525 | KGYTKGGPGHEEPVL     | ZIKV553 | LGRMDGPRRPVKYEE     |
| ZIKV498 | SSTATSLCNIFRGSY     | ZIKV526 | GGPGHEEPVLVQSYG     | ZIKV554 | GPRRPVKYEEDVNLG     |
| ZIKV499 | SLCNIFRGSYLAGAS     | ZIKV527 | EEPVLVQSYGWNIVR     | ZIKV555 | VKYEEDVNLGSGTRA     |
| ZIKV500 | FRGSYLAGASLIYTV     | ZIKV528 | VQSYGWNIVRLKSGV     | ZIKV556 | DVNLGSGTRAVVSCA     |
| ZIKV501 | LAGASLIYTVTRNAG     | ZIKV529 | WNIVRLKSGVDVFHM     | ZIKV557 | SGTRAVVSCAEAPNM     |
| ZIKV502 | LIYTVTRNAGLVKRR     | ZIKV530 | LKSGVDVFMMAEPC      | ZIKV558 | VVSCAEAPNMKIIGN     |
| ZIKV503 | TRNAGLVKRRGGGTG     | ZIKV531 | DVFMMAEPCDTLLC      | ZIKV559 | EAPNMKIIGNRIERI     |
| ZIKV504 | LVKRRGGGTGETLGE     | ZIKV532 | AAEPCDTLLCDIGES     | ZIKV560 | KIIGNRIERIRSEHA     |
| ZIKV505 | GGGTGETLGEKWKAR     | ZIKV533 | DTLLCDIGESSSSPE     | ZIKV561 | RIERIRSEHAETWFF     |
| ZIKV506 | ETLGEKWKARLNQMS     | ZIKV534 | DIGESSSSPEVEEAR     | ZIKV562 | RSEHAETWFFDENHP     |
| ZIKV507 | KWKARLNQMSALEFY     | ZIKV535 | SSSPEVEEARLRLV      | ZIKV563 | ETWFFDENHPYRTWA     |
| ZIKV508 | LNQMSALEFYSYKKS     | ZIKV536 | VEEARLRLVLSMVG      | ZIKV564 | DENHPYRTWAYHGSY     |
| ZIKV509 | ALEFYSYKKS GITEV    | ZIKV537 | TLRLVLSMVG DWLEKR   | ZIKV565 | YRTWAYHGSYEAPTQ     |
| ZIKV510 | SYKKS GITEV CREEA   | ZIKV538 | SMVG DWLEKR PGAF    | ZIKV566 | YHGSYEAPTQGSASS     |
| ZIKV511 | GITEV CREEA RALK    | ZIKV539 | WLEKR PGAF CIK VLC  | ZIKV567 | EAPTQGSASSLINGV     |
| ZIKV512 | CREEA RALK DGVAT    | ZIKV540 | PGAF CIK VLC PYTST  | ZIKV568 | GSASSLINGV VRLLS    |
| ZIKV513 | RRALK DGVAT GGHAV   | ZIKV541 | IKVLC PYTST MMETL   | ZIKV569 | LINGV VRLLSK PWDV   |
| ZIKV514 | DGVAT GGHAV SRGSA   | ZIKV542 | PYTST MMETL ER LQR  | ZIKV570 | VRLLSK PWDV VTGVT   |
| ZIKV515 | GGHAV SRGSA KLRWL   | ZIKV543 | MMETL ER LQR RYGGG  | ZIKV571 | KPWDV VTGVT GIAMT   |
| ZIKV516 | SRGSA KLRWL VERGY   | ZIKV544 | ER LQR RYGGG LVRVP  | ZIKV572 | VTGVT GIAMT DTPY    |
| ZIKV517 | KLRWL VERGY LQPYG   | ZIKV545 | RYGGG LVRVP LSRNS   | ZIKV573 | GIAMT DTPY GQQRV    |
| ZIKV518 | VERGY LQPYG KVIDL   | ZIKV546 | LVRVP LSRNS THEM    | ZIKV574 | DTPY GQQRV FKEKV    |
| ZIKV519 | LQPYG KVIDL GCGRG   | ZIKV547 | LSRNS THEM YVSGA    | ZIKV575 | GQQRV FKEKV DTRVP   |
| ZIKV520 | KVIDL GCGRG GWSYY   | ZIKV548 | THEM YVSGA KSN TI   | ZIKV576 | FKEKV DTRVP DPQEG   |
| ZIKV521 | GCGRG GWSYY VATIR   | ZIKV549 | WVSGA KSN TI KSVST  | ZIKV577 | DTRVP DPQEG TRQVM   |
| ZIKV522 | GWSYY VATIR KQVEV   | ZIKV550 | KSNTI KSVSTTS QLL   | ZIKV578 | DPQEG TRQVM SMVSS   |
| ZIKV523 | VATIR KQVEV KGYTK   | ZIKV551 | KSVSTTS QLL GRMD    | ZIKV579 | TRQVM SMVSS WLWKE   |

| Peptide | Amino Acid Sequence | Peptide | Amino Acid Sequence | Peptide | Amino Acid Sequence |
|---------|---------------------|---------|---------------------|---------|---------------------|
| ZIKV580 | SMVSSWLWKELGKHK     | ZIKV608 | LG YVLEEMSRIPGGR    | ZIKV636 | RLKRMAVSGDDCVVK     |
| ZIKV581 | WLWKELGKHKRPRVC     | ZIKV609 | EEMSRIPGGRMYADD     | ZIKV637 | AVSGDDCVVKPIDDR     |
| ZIKV582 | LGKHKRPRVCTKEEF     | ZIKV610 | IPGGRMYADDTAGWD     | ZIKV638 | DCVVKPIDDRFAHAL     |
| ZIKV583 | RPRVCTKEEFINKVR     | ZIKV611 | MYADDTAGWDTRISR     | ZIKV639 | PIDDRFAHALRFLND     |
| ZIKV584 | TKEEFINKVRSNAAL     | ZIKV612 | TAGWDTRISRFLEN      | ZIKV640 | FAHALRFLNDMGKVR     |
| ZIKV585 | INKVRSNAALGAIFE     | ZIKV613 | TRISRFLENEALIT      | ZIKV641 | RFLNDMGKVRKDTQE     |
| ZIKV586 | SNAALGAIFEEKEW      | ZIKV614 | FDLENEALITNQMEK     | ZIKV642 | MGKVRKDTQEWKPST     |
| ZIKV587 | GAIFEEKEWKTAVE      | ZIKV615 | EALITNQMEKGHRAL     | ZIKV643 | KDTQEWKPSTGWDNW     |
| ZIKV588 | EEKEWKTAVEAVNDP     | ZIKV616 | NQMEKGHRALALAI      | ZIKV644 | WKPSTGWDNWEEVPF     |
| ZIKV589 | KTAVEAVNDPRFWAL     | ZIKV617 | GHRALALAIKYTYQ      | ZIKV645 | GWDNWEEVPFCSHHF     |
| ZIKV590 | AVNDPRFWALVDKER     | ZIKV618 | ALAIKYTYQNKVVK      | ZIKV646 | EEVPFCSHHFNKLHL     |
| ZIKV591 | RFWALVDKEREHHLR     | ZIKV619 | KYTYQNKVVKVLRPA     | ZIKV647 | CSHHFNKLHLKDGRS     |
| ZIKV592 | VDKEREHHLRGECQS     | ZIKV620 | NKVVKVLRPAEKGT      | ZIKV648 | NKLHLKDGRSIVVPC     |
| ZIKV593 | EHHLRGECQSCVYNM     | ZIKV621 | VLRPAEKGTVMVDII     | ZIKV649 | KDGRSIVVPCRHQDE     |
| ZIKV594 | GECQSCVYNNMGKRE     | ZIKV622 | EKGKTVMDIISRQDQ     | ZIKV650 | IVVPCRHQDELIGRA     |
| ZIKV595 | CVYNNMGKREKKQGE     | ZIKV623 | VMDIISRQDQRGSGQ     | ZIKV651 | RHQDELIGRARVSPG     |
| ZIKV596 | MGKREKKQGEFGKAK     | ZIKV624 | SRQDQRGSGQVVTYA     | ZIKV652 | LIGRARVSPGAGWSI     |
| ZIKV597 | KKQGEFGKAKGSRAI     | ZIKV625 | RGSGQVVTYALNTFT     | ZIKV653 | RVSPGAGWSIRETAC     |
| ZIKV598 | FGKAKGSRAIWMWL      | ZIKV626 | VVTYALNTFTNLVVQ     | ZIKV654 | AGWSIRETACLAKSY     |
| ZIKV599 | GSRAIWMWLGARFL      | ZIKV627 | LNTFTNLVVQLIRNM     | ZIKV655 | RETACLAQSYAQMWW     |
| ZIKV600 | WYMWLGARFLEFEAL     | ZIKV628 | NLVVQLIRNMEAEV      | ZIKV656 | LAKSYAQMWWQLLYFH    |
| ZIKV601 | GARFLEFEALGFLNE     | ZIKV629 | LIRNMEAEVLEMVD      | ZIKV657 | AQMWWQLLYFHRRDLR    |
| ZIKV602 | EFEALGFLNEDHWMG     | ZIKV630 | EAEVLEMVDLWLLR      | ZIKV658 | LLYFHRRDLRLMANA     |
| ZIKV603 | GFLNEDHWMGRENSG     | ZIKV631 | LEMVDLWLLRRSEKV     | ZIKV659 | RRDLRLMANAICSSV     |
| ZIKV604 | DHWMGRENSGGGVEG     | ZIKV632 | LWLLRRSEKVTNWLQ     | ZIKV660 | LMANAICSSVPVDWV     |
| ZIKV605 | RENSGGGVEGLGLQR     | ZIKV633 | RSEKVTNWLQSNQWD     | ZIKV661 | ICSSVPVDWVPTGRT     |
| ZIKV606 | GGVEGLGLQLRGYVL     | ZIKV634 | TNWLQSNQWDRLKRM     | ZIKV662 | PVDWVPTGRTTWSIH     |
| ZIKV607 | LGLQLRGYVLEEMSR     | ZIKV635 | SNGWDRLKRMAVSGD     | ZIKV663 | PTGRTTWSIHGKGEW     |

| <b>Peptide</b> | <b>Amino Acid Sequence</b> |
|----------------|----------------------------|
| ZIKV664        | TWSIHGKGEWMTTED            |
| ZIKV665        | GKGEWMTTEDMLVWV            |
| ZIKV666        | MTTEDMLVWVNRVWI            |
| ZIKV667        | MLVWVNRVWIEENDH            |
| ZIKV668        | NRVWIEENDHMEDKT            |
| ZIKV669        | EENDHMEDKTPVTKW            |
| ZIKV670        | MEDKTPVTKWTDIPY            |
| ZIKV671        | PVTKWTDIPYLGKRE            |
| ZIKV672        | TDIPYLGKREDLWCG            |
| ZIKV673        | LGKREDLWCGSLIGH            |
| ZIKV674        | DLWCGSLIGHRPRTT            |
| ZIKV675        | SLIGHRPRTTWAENI            |
| ZIKV676        | RPRTTWAENIKNTVN            |
| ZIKV677        | WAENIKNTVNMVRRRI           |
| ZIKV678        | KNTVNMVRRRIIGDEE           |
| ZIKV679        | MVRRRIIGDEEKYMDY           |
| ZIKV680        | IGDEEKYMDYLSTQV            |
| ZIKV681        | KYMDYLSTQVRYLGE            |
| ZIKV682        | LSTQVRYLGEEGSTP            |
| ZIKV683        | RYLGEEGSTPGVL              |

# Supplementary Discussion

---

## Findings summary

In summary, dissecting our main findings per previous ZIKV-immune status we found that a ZIKV middle-convalescence: (i) results in shorter DENV viremic period, (ii) lowest pro-inflammatory status with upregulation of cellular immune response mediators, (iii) robust neutralizing antibody response higher in magnitude and durability against ZIKV strains and DENV serotypes, (iv) elevated activated and proliferating B cells, (v) early activation of cross-reactive CD4<sup>+</sup> and CD8<sup>+</sup> effector memory T cells, (vi) and a major breadth of functional T cell response. For ZIKV early-convalescence we demonstrated: (i) average DENV viremic period and no exacerbation of pro-inflammatory status, (ii) neutralizing antibody response with high magnitude but less durability against ZIKV strains and DENV serotypes compared to the ZIKV middle-convalescent group, (iii) early activation of central memory CD8<sup>+</sup> T cells, (iv) and very limited activation of effector memory T cells. For the ZIKV-naïve group we demonstrated: (i) longer DENV viremic period and pro-inflammatory status, (ii) a more delayed *de novo* neutralizing antibody response against DENV serotypes and inability to neutralize ZIKV strains, (iii) a limited B cell response, (iv) and an overall *de novo* T cell response lower in magnitude and cross-reactivity compared to ZIKV-immune groups.

## DENV RNAemia

The lack of significant DENV RNAemia enhancement and pro-inflammatory status in ZIKV immune animals in our work, compared to *George et al.*, may be attributable to the different sample types collected (plasma vs serum), or different DENV-2 strains used for the challenge (New Guinea/1944 strain vs Thailand/16681/1964 strain, from Asian II and Asian I Genotype, respectively). The strains fact is of relevance because it suggests that the effect of previous ZIKV immunity on a subsequent DENV infection may differ between DENV serotypes or even within genotypes. Another possible explanation is the genetic heterogeneity of rhesus macaques used in these two studies as they are derived from different breeders. The importance of selecting genetic well-characterized macaques have been discussed previously<sup>1</sup>.

## Cytokine profile

A lack of ZIKV immunity promoted a more pro-inflammatory profile after DENV infection characterized by significant elevated levels of IL-6 and MIG/CXCL9. Interestingly, higher levels of IFN- $\alpha$  were observed in the ZIKV-naïve animals. This antiviral cytokine is known to be actively produced during acute DENV infection *in vitro* and *in vivo*<sup>2</sup>. Elevated levels have been correlated with severity in DHF patients, and to act as a marker for elevated DENV replication<sup>3,4</sup>. On the other hand, the presence of a longer ZIKV convalescence is associated with increased levels of CXCL10 and perforin. CXCL10 is an immune mediator for T cells proliferation, recruitment of CD4<sup>+</sup> and CD8<sup>+</sup> activated T cells and IFN- $\gamma$ -producing CD8<sup>+</sup> T cells, required to control DENV infection *in vivo*<sup>5,6</sup>. This correlates with higher proportion and activation of both T cell compartments and subsequent functional T cell response against DENV-E-specific peptides

in the group with longer convalescence to ZIKV. Perforin is involved in the cytotoxic degranulation process against virus-infected cells. In DENV infection, perforin is part of the anti-DENV cytotoxic phenotype of CD8<sup>+</sup> and CD4<sup>+</sup> T cells<sup>7,8</sup>. Perforin levels were significantly elevated only in the ZIKV mid-convalescent group after DENV infection. Accordingly, this coincides with a significant activation of CD8<sup>+</sup> and CD4<sup>+</sup> effector memory T cells, and degranulation functional response of both T cell compartments, suggesting an enhanced perforin-producing cytotoxic role of T cells in presence of longer convalescence to ZIKV. Contrary to our findings, a previously published work found that an approximately two month ZIKV immunity period resulted in an increase of pro-inflammatory cytokines<sup>9</sup>. However, a differential effect due to the use of different sample types (plasma vs serum) between both studies cannot be ruled out.

### **Neutralizing antibody response**

Is still uncertain why the ZIKVPF-10mo animals have a slightly higher peak of Ab response compared to the ZIKVPR-2mo animals. We speculate this may be caused by modification of MBCs overtime, so that by 10 months the cells are able to better respond to antigen compared to cells at two months. After ZIKV infection in human DENV-naïve subjects, the ZIKV/DENV cross-reactive MBC response increased in magnitude (39% of total MBC proportion) after longer periods of ZIKV convalescence (~8 months post-ZIKV infection)<sup>10</sup>, similar to the 10 months in the ZIKV mid-convalescent group that exhibited higher DENV cross-neutralization. Based upon studies of human monoclonal Abs, plasmablasts response during secondary DENV infection is mainly of MBC origin, resulting in a mature response characterized by cross-neutralizing Abs *in vitro*<sup>11</sup>. These are seminal contributions to forecast and understand the cross-neutralization capacity of further heterologous DENV epidemics in the context of previous ZIKV-DENV immunity. Interestingly, ZIKV-convalescent animals showed some degree of cross-neutralization against DENV-2 and DENV-4 before DENV infection. This is consistent with our previous results showing that DENV-naïve ZIKV-infected animals also preferentially neutralized DENV-4 followed by DENV-2 after ZIKV infection<sup>12</sup>. Longitudinal data of cross-neutralization of DENV serotypes in DENV-naïve ZIKV-infected human subjects showed low cross-neutralization against all DENV serotypes, but DENV-4 followed by DENV-2 were neutralized more efficiently up to 6 months after ZIKV infection with comparable basal titers reported here<sup>13</sup>. There is no data yet that delineates shared cross-neutralizing epitopes between ZIKV and DENV-2/-4, but it is known that DENV-4 genotypic diversity impact the capacity of its neutralization<sup>14</sup>. On the other hand, we showed that naïve animals with DENV *de novo* response did not cross-neutralized ZIKV at all, which state that although similar, antigenic differences are sufficient to mount predominantly type-specific rather than cross-reactive responses during a primary infection<sup>10,15</sup>.

### **T cells phenotyping**

The ZIKV early-convalescent group displays a modest activation (T-CM>T-EM) early after DENV infection (Supplementary Discussion: T cells phenotyping). Since this group was infected with ZIKV only two months before DENV it is possible that after viral clearance and

development of ZIKV-specific T cell response, the T cell compartments were still under the contraction phase at the time of the DENV challenge. Yellow fever virus (YFV) and vaccinia virus vaccinations in humans demonstrate that T cell contraction start as early as approximately one-month post-vaccination and at least for almost three months is still ongoing<sup>16</sup>. Also, a study shows that re-stimulation using alphavirus replicons during T cell response contraction does not have significant impact modulating the pre-existing T cell response<sup>17</sup>.

### **T cells functional response**

Strikingly, this response recognizes more efficiently peptides from DENV E protein than from ZIKV E protein. ZIKV-specific CD8<sup>+</sup> T cells direct 57% of their response against structural proteins, which may suggest these cells can recognize conserved epitopes between ZIKV and DENV structural proteins. Cross-reactivity of T cells between heterologous flavivirus infections is explained by selective immune recall of memory T cells that recognize conserved epitopes between DENV and ZIKV<sup>18</sup>, which also has previously been demonstrated during secondary heterotypic DENV infections<sup>19,20</sup>.

Higher proportion of IFN- $\gamma$  and TNF- $\alpha$  producing T cells before a secondary heterologous DENV infection has been associated to a subsequent subclinical outcome<sup>21</sup>. Herein, we observed that the ZIKV mid-convalescent group had elevated levels of IFN- $\gamma$  and TNF- $\alpha$  producing T cells since baseline. In this group, DENV infection stimulated a higher frequency of these cells, but remarkably, also increased highly cross-reactive IFN- $\gamma$ -producing CD4<sup>+</sup> T cells directed to DENV E, and ZIKV E/NS proteins.

# Supplementary References

---

- 1 Kanthaswamy, S. *et al.* The Population Genetic Composition of Conventional and SPF Colonies of Rhesus Macaques (*Macaca mulatta*) at the Caribbean Primate Research Center. *Journal of the American Association for Laboratory Animal Science : JAALAS* **55**, 147-151 (2016).
- 2 Gandini, M. *et al.* Dengue virus activates membrane TRAIL relocalization and IFN- $\alpha$  production by human plasmacytoid dendritic cells in vitro and in vivo. *PLoS neglected tropical diseases* **7**, e2257, doi:10.1371/journal.pntd.0002257 (2013).
- 3 Kurane, I. *et al.* High levels of interferon alpha in the sera of children with dengue virus infection. *The American journal of tropical medicine and hygiene* **48**, 222-229 (1993).
- 4 Singla, M. *et al.* Immune Response to Dengue Virus Infection in Pediatric Patients in New Delhi, India--Association of Viremia, Inflammatory Mediators and Monocytes with Disease Severity. *PLoS neglected tropical diseases* **10**, e0004497, doi:10.1371/journal.pntd.0004497 (2016).
- 5 Dufour, J. H. *et al.* IFN- $\gamma$ -inducible protein 10 (IP-10; CXCL10)-deficient mice reveal a role for IP-10 in effector T cell generation and trafficking. *Journal of immunology (Baltimore, Md. : 1950)* **168**, 3195-3204 (2002).
- 6 Hsieh, M. F. *et al.* Both CXCR3 and CXCL10/IFN-inducible protein 10 are required for resistance to primary infection by dengue virus. *Journal of immunology (Baltimore, Md. : 1950)* **177**, 1855-1863 (2006).
- 7 Weiskopf, D. *et al.* Dengue virus infection elicits highly polarized CX3CR1<sup>+</sup> cytotoxic CD4<sup>+</sup> T cells associated with protective immunity. *Proceedings of the National Academy of Sciences of the United States of America* **112**, E4256-4263, doi:10.1073/pnas.1505956112 (2015).
- 8 Gagnon, S. J., Ennis, F. A. & Rothman, A. L. Bystander target cell lysis and cytokine production by dengue virus-specific human CD4(+) cytotoxic T-lymphocyte clones. *Journal of virology* **73**, 3623-3629 (1999).
- 9 George, J. *et al.* Prior Exposure to Zika Virus Significantly Enhances Peak Dengue-2 Viremia in Rhesus Macaques. *Scientific reports* **7**, 10498, doi:10.1038/s41598-017-10901-1 (2017).
- 10 Andrade, P. *et al.* Impact of pre-existing dengue immunity on human antibody and memory B cell responses to Zika. *Nature communications* **10**, 938, doi:10.1038/s41467-019-08845-3 (2019).
- 11 Priyamvada, L. *et al.* B Cell Responses during Secondary Dengue Virus Infection Are Dominated by Highly Cross-Reactive, Memory-Derived Plasmablasts. *J Virol* **90**, 5574-5585, doi:10.1128/jvi.03203-15 (2016).
- 12 Pantoja, P. *et al.* Zika virus pathogenesis in rhesus macaques is unaffected by pre-existing immunity to dengue virus. *Nature communications* **8**, 15674, doi:10.1038/ncomms15674 (2017).
- 13 Montoya, M. *et al.* Longitudinal Analysis of Antibody Cross-neutralization Following Zika Virus and Dengue Virus Infection in Asia and the Americas. *J Infect Dis* **218**, 536-545, doi:10.1093/infdis/jiy164 (2018).
- 14 Gallichotte, E. N. *et al.* Genetic Variation between Dengue Virus Type 4 Strains Impacts Human Antibody Binding and Neutralization. *Cell reports* **25**, 1214-1224, doi:10.1016/j.celrep.2018.10.006 (2018).



- 15 Collins, M. H. *et al.* Lack of Durable Cross-Neutralizing Antibodies Against Zika Virus from Dengue Virus Infection. *Emerging infectious diseases* **23**, 773-781, doi:10.3201/eid2305.161630 (2017).
- 16 Miller, J. D. *et al.* Human effector and memory CD8+ T cell responses to smallpox and yellow fever vaccines. *Immunity* **28**, 710-722, doi:10.1016/j.immuni.2008.02.020 (2008).
- 17 Knudsen, M. L. *et al.* Kinetic and phenotypic analysis of CD8+ T cell responses after priming with alphavirus replicons and homologous or heterologous booster immunizations. *Journal of virology* **88**, 12438-12451, doi:10.1128/jvi.02223-14 (2014).
- 18 Grifoni, A. *et al.* Prior Dengue virus exposure shapes T cell immunity to Zika virus in humans. *J Virol* DOI **10.1128/jvi.01469-17**, doi:10.1128/jvi.01469-17 (2017).
- 19 Weiskopf, D. *et al.* Comprehensive analysis of dengue virus-specific responses supports an HLA-linked protective role for CD8+ T cells. *Proceedings of the National Academy of Sciences of the United States of America* **110**, E2046-2053, doi:10.1073/pnas.1305227110 (2013).
- 20 Mathew, A. *et al.* Predominance of HLA-restricted cytotoxic T-lymphocyte responses to serotype-cross-reactive epitopes on nonstructural proteins following natural secondary dengue virus infection. *Journal of virology* **72**, 3999-4004 (1998).
- 21 Hatch, S. *et al.* Intracellular cytokine production by dengue virus-specific T cells correlates with subclinical secondary infection. *J Infect Dis* **203**, 1282-1291, doi:10.1093/infdis/jir012 (2011).
